# Supplementary material for: Virology in Schoolbooks—A Comprehensive Analysis of Austrian Biology Textbooks for Secondary School and Implications for Improvement
Source: MDPI journal article supplement (doi:10.3390/su141811562), 2022-09-15
Supplement: s1 [file s1]

## **Supplementary Material S3: Coding Guide (How to use the coding matrix)**

For all categories in which many terms have to be counted (especially technical terms but depending on school grade virus and disease names, too), it has proven useful to first collect terms separated with commas in a Word document. Then use the "search-and-replace" function to convert commas into line breaks. This list can be copied into an Excel file, checked for duplicates using the data cleansing function and the total number of lines counted.

*[Note: For copyright reasons several figures show complete schoolbook pages, not only the figure on these pages referred to. In these cases, the respective figures are marked by a red square. In cases we could obtain permission for reprinting single figures, these are shown separately.]*

### **C 1 - Content**

**C 1.1 Are there one or more subchapters, info boxes, paragraphs, etc. (not merely single sentences), as well as figures specifically devoted to viruses?**

**➔ If yes, how many pages (estimated)?**



The goal here is to estimate the extent to which a textbook deals with the topic of viruses. To do this, virus-related terms are marked (see Fig. 1). This shows which paragraphs deal with viruses and do not only mention them in one sentence. Then, the proportion of these paragraphs compared to the respective whole pages are estimated and added up for the whole book.

Pages referring to viruses are listed in the field "Type" together with a brief description. In the field "Number", the extent of all relevant sections is added up and the resulting sum of pages is entered. In the final evaluation, this number is put in relation to the total number of pages of the respective textbook. Assignments and illustrations are also taken into account when estimating the total amount of space dedicated to viruses.

**Example of "Yes" 1:** The chapter "Viruses, Prokaryotes, and Eukaryotes," begins on page 42; about a quarter of this page refers specifically to viruses. The topic is continued on page 43, the whole content on this page is related to viruses. Thus, "p. 42f chapter Viruses, prokaryotes and eukaryotes (1,25)" is entered in the "Type" field (Figure S1).

**Example of "Yes" 2:** The chapter on sexually transmitted infections starts on page 50 in a very general way, thus, only about 10% of the page is counted here. On page 51, there is text and illustrations on specific viral infections amounting to about 60% of the page. In summary, "p. 50f sexually transmitted diseases (0.7)" is entered in the "Type" field (Figure S2).



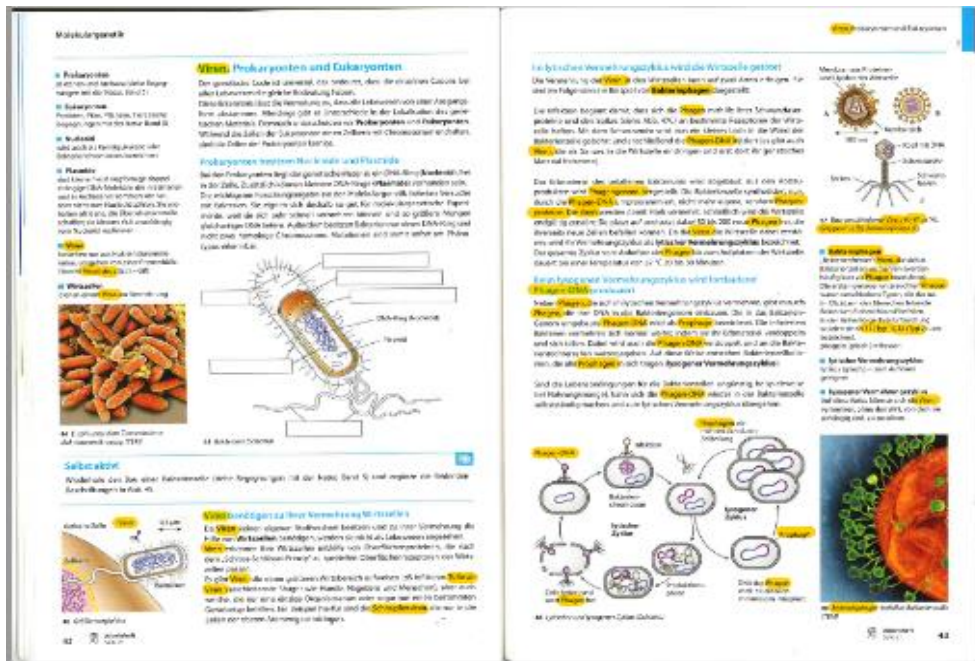

Figure S1. Begegnungen mit der Natur 8 (Biegl, 2015), markings by NH.

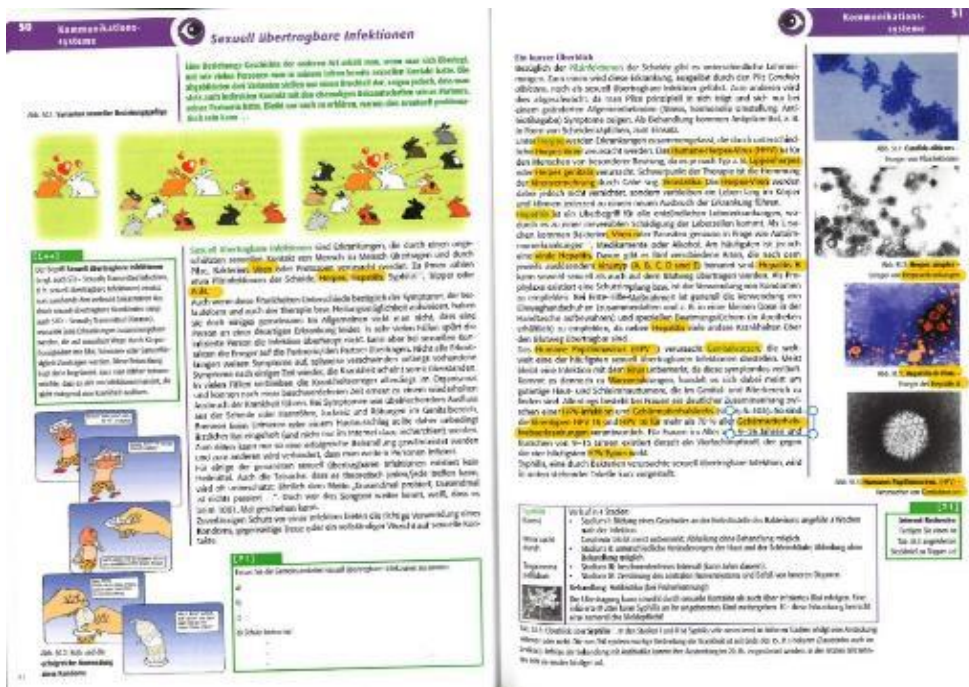

Figure S1. klar\_Biologie 6 (Baloch, & Deutsch 2010), markings by NH.



**Example of "No" 1:** The word “hepatitis” occurs in a single sentence only; this sentence is not counted (Figure S3).

**Example of "No" 2:** The word "viruses" occurs in the chapter "Fungi". This is not a relevant section, but a single mentioning (Figure S4).

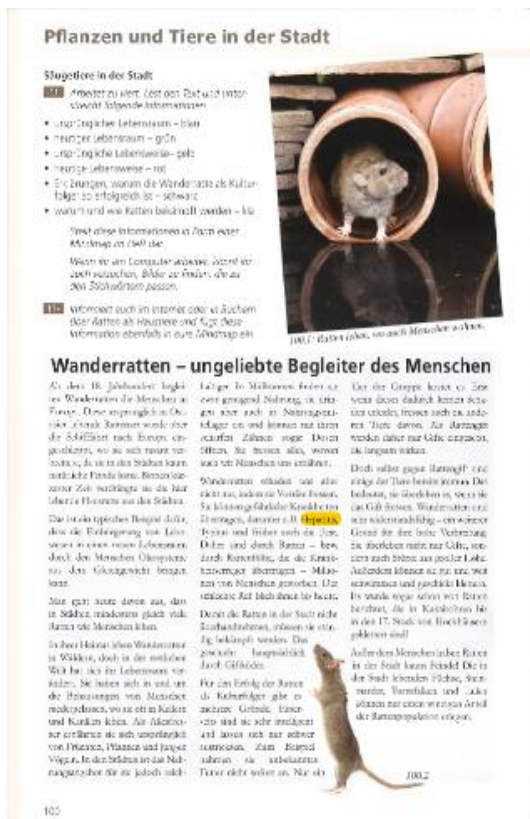

Figure S2. basic biology 4 (Bergmann & del Cuento Lopez, 2015), markings by NH.

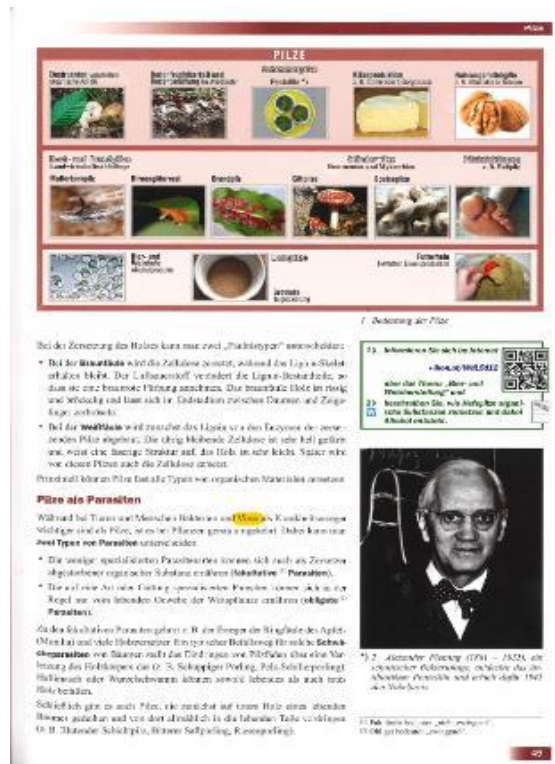

Figure S3. Welt des Lebens 5 (Hännl & Kopeszki, 2017), markings by NH.

## C 1.2 Are viruses mentioned?

➔ If yes, which ones?

Each virus mentioned is counted. If multiple names are used for the same virus (for example, flu virus and influenza virus), this is counted as one and both names are entered in the "Type" field.



Generic terms are also counted, both taxonomic groups and references to hosts and classification according to kind of genetic material (e.g., "hepadnaviruses", "retroviruses", "DNA viruses", "human pathogenic viruses", ...).

The mere naming of a disease triggered by the virus is not counted, even if the virus bears the name of the disease (e.g., measles). However, if such a disease is mentioned and it is added that the causal pathogen is a virus, this counts as mentioning the virus (e.g., measles virus, measles which are caused by virus).

**Example of "Yes" 1:** "The diseases common cold, influenza, polio, jaundice (hepatitis), rabies, and AIDS are examples of viral infections." (BioTOP SB 4, page 48; Jilka & Kadlec, 2017). Cold virus, Flu virus, Polio virus, Hepatitis virus, Rabies virus, and "Virus that causes AIDS" are listed in the "Type" field and the value 6 is entered in the "Number" field. In this textbook, from page 50 onwards, the topic of AIDS is also dealt with thoroughly and HIV is mentioned specifically. The number of viruses mentioned is not changed by this, but the designation "virus that causes AIDS" can be supplemented or replaced by HIV.

**Example of "Yes" 2:** "The principle of RNA interference is already being used successfully in research, e.g., to specifically silence genes and thus determine their function. In addition, it is being investigated how to combat RNA viruses with siRNA." (Linder Biologie 8, p. 36; Reitböck et al., 2019). Here, RNA virus is entered in the "Type" field, and the number in the "Number" field increases by 1.

**Example of "No" 1:** "Ticks are disease vectors. They transmit TBE and Lyme disease." (B & U 2 neu, p. 104; Schullerer & Burgstaller, 2013). This mentioning of TBE is counted as a virus-related disease in C 1.8 (see below), but not for this category.



**Example of "No" 2:** "My name: Louis Pasteur (1822-1895). Interesting facts about me: I developed vaccines against anthrax, glanders, and rabies." (Leben 4, p. 44; Cholewa et al., 2013). This mentioning of rabies is counted as a virus-related disease in C 1.8, as well as rabies vaccination in C 1.10, but not in this category.

### **C 1.3 Is a virus defined as a non-living particle?**

If the text describes, that viruses are non-living things, this will result in a rating of "Yes" in this category. A paragraph describing the characteristics of life but making no reference to viruses does not count.

**Example of "Yes" 1:** "Since viruses do not have their own metabolism and require the help of host cells to reproduce, they are not considered living beings." (Begegnungen mit der Natur 8, p. 42; Biegl, 2015).

**Example of "Yes" 2:** "Viruses are no living things." (Biologie für alle 4, p. 54; Drexler et al., 2014).

**Example of "No" 1:** "Viruses are so small that they can only be visualized with an electron microscope. They are not cells but consist of a protein capsule only that encloses the genetic material. Viruses also have no metabolism of their own and cannot reproduce themselves. They are extremely regressed parasites that attack living cells, the host cells." (BIO LOGISCH 4, p. 40; Jaenicke et al., 2017). Some characteristics of viruses are mentioned, but it is not clearly stated that viruses are no living organisms.

**Example of "No" 2:** "Some researchers say that viruses are not living things. Check this opinion against the characteristics of life." (BIOS 4, p. 58; Keil et al., 2010). If this assignment is not discussed in class, it cannot be guaranteed that students will come to the correct conclusion.



#### **C 1.4 Is the structure of a virus described and/or illustrated?**

##### **→ If yes, of which virus?**

The structure of a virus can be described in the main text or displayed in an illustration. In the field "Type" those viruses are entered, whose structure is dealt with. If it is not a specific virus, enter "Virus, generic" here. In the field "Number" the described viruses are counted, but only once per virus type, even if there are several representations.

**Example of "Yes" 1:** "They are not cells but consist only of a protein capsule that encloses the genetic material." (BIO LOGISCH 4, p. 40; Jaenicke et al., 2017).

**Example of "Yes" 2 (see Figure S5):** A bacteriophage is drawn and labelled in great detail.

#### **C 1.5 Is the size of viruses described and/or illustrated?**

The description can be in writing or graphically - in case of a graph, size comparisons and illustrations with indicated scale or magnification factor are necessary for a "Yes".

**Example of "Yes" 1:** "Causative agents of colds or flu, for example, are so tiny that they can only be recognized with an electron microscope. (Electron microscopes magnify up to 300 times as much as light microscopes). They are viruses." (Über die Natur 2, p. 19; Dobers et al., 2011)

**Example of "Yes" 2 (see Figure S6):** In this task, the size of influenza viruses is to be calculated; the magnification factor is given in the caption.



**Transduktion**

**Bakteriophagen** (kurz Phagen) sind Viren, die sich vermehren, indem sie ihr Erbgut in Bakterien einschleusen (Abb. 148.1).

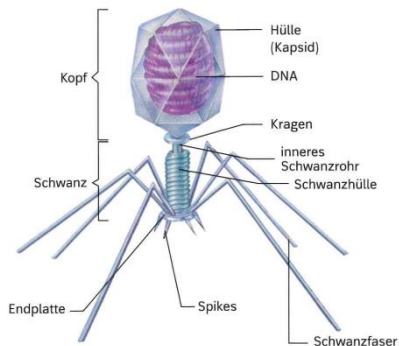

Abb. 148.1: Bau eines Bakteriophagen. Im „Kopf“ des Virus befindet sich das Erbgut in Form eines DNA-Moleküls.

Bei Bakteriophagen unterscheidet man zwei unterschiedliche Vermehrungszyklen: den lytischen und den lysogenen Vermehrungszyklus.

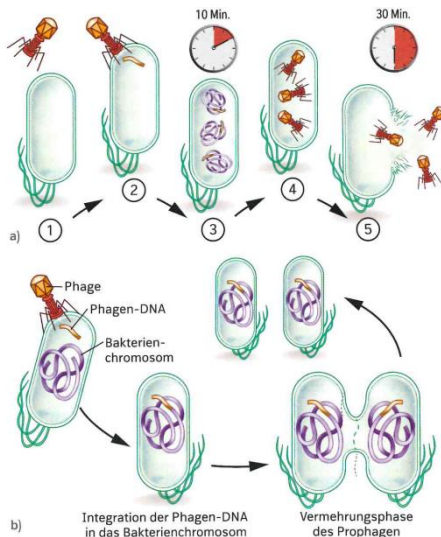

Abb. 148.2: Vermehrung eines Bakteriophagen. a) Lytischer Vermehrungszyklus: 1 Anheftung, 2 Injektion, 3 Veränderung des bakteriellen Stoffwechsels, 4 Phagenbestandteile werden aufgebaut, 5 Lyse des Bakteriums entlässt die Bakteriophagen; b) lysogener Vermehrungszyklus

**Lytischer Vermehrungszyklus:** Phagen heften sich an bestimmte Stellen der Zellwand der Bakterienzelle. Mithilfe eines Enzyms (Lysozym) der Phagenhülle wird die Bakterienzellwand lokal aufgelöst. Durch das entstandene Loch wird die Nucleinsäure in die Bakterienzelle injiziert. In der Bakterienzelle wird der Stoffwechsel nun so verändert, dass sie die einzelnen Phagenbestandteile herstellt. Diese setzen sich dann zu kompletten neuen Phagen zusammen (Abb. 148.2a; S. 84, Basiskonzept Steuerung und Regelung).

**Lysogener Vermehrungszyklus:** Bei dieser Vermehrungsart bauen Phagen ihre Erbinformation ebenfalls in die Bakterien-DNA ein. Die Phagen-DNA bleibt als sogenannter **Prophage** inaktiv, wird aber bei jeder Zellteilung an die Folgezellen weitergegeben (Abb. 148.2b). Phagen, die Bakterien infizieren, aber nicht gleich aktiv werden, bezeichnet man als **temperente Phagen**. Wird der Prophage aktiviert, wird er in einem lytischen Zyklus vermehrt und die neugebildeten Phagen verlassen die Wirtszelle. Aus einem temperenten ist ein **virulenter Phage** geworden.

Bei der Neubildung von Phagen können auch angrenzende Abschnitte der Bakterien-DNA mit ausgeschnitten werden. Verlässt der Phage das Bakterium und infiziert eine andere Wirtszelle, kann so auch bakterielle DNA übertragen werden. Eine solche Übertragung von DNA mithilfe von Phagen wird **Transduktion** genannt. Die Gentechnik macht sich diese Methode zunutze, indem sie Viren zur Übertragung von Fremd-DNA einsetzt.

☒ Kreuzen Sie die richtige Aussage an.

Transduktion ist

- a) die Übertragung von Viren in Bakterien.
- b) das Durchdringen der Bakterienhülle durch virale DNA.
- c) die Übertragung von DNA mithilfe von Viren.
- d) das Einschleusen eines Phagen in eine Eukaryotenzelle.
- e) die Veränderung des Erbguts durch direkte Übertragung von DNA.

Transformation ist

- a) die Veränderung von bakteriellem Erbgut durch Viren.
- b) die Veränderung des Genotyps einer Zelle durch Aufnahme von DNA.
- c) das Umschreiben eines RNA-Codes in einen DNA-Code.
- d) die Veränderung einer Proteinstruktur durch Abänderung der entsprechenden mRNA-Basensequenz.
- e) das Ausschneiden eines DNA-Stücks durch Restriktionsenzyme.



**Selbst aktiv!**

Berechne die Vergrößerungen der abgebildeten Objekte (benutze dazu ein Lineal) und gib die Ergebnisse in der Bildlegende an.

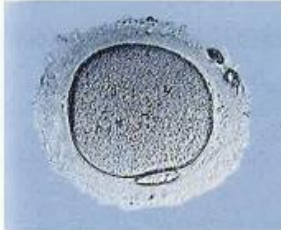

Eine menschliche Eizelle hat eine Größe von etwa 0,2 mm. Demnach handelt es sich hier um eine etwa .....fache Vergrößerung.

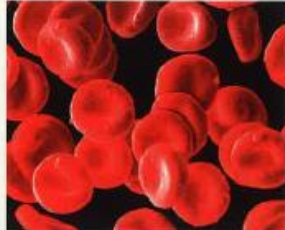

Im Bild siehst du rote Blutkörperchen 100-fach vergrößert. Berechne ihre Originalgröße.

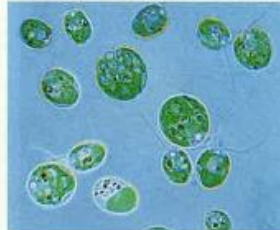

Die Grünalge *Chlamydomonas* hat einen Durchmesser von durchschnittlich 15 µm. Die abgebildeten Algen sind etwa .....fach vergrößert.

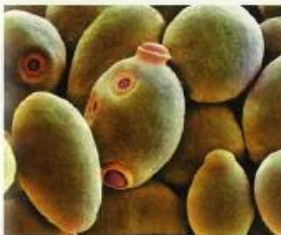

Hefezellen sind oval mit einer Größe von 5 bis 8 µm. Wir sehen hier eine etwa .....fache Vergrößerung.

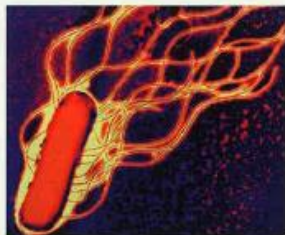

Salmonellen sind durchschnittlich 3,5 µm lang. In der Abbildung ist ein Bakterium etwa .....fach vergrößert dargestellt.

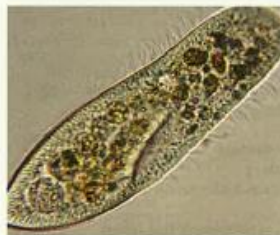

Das Pantoffeltierchen ist mit etwa 0,3 mm Länge einer der größten Einzeller. Wir sehen es hier etwa .....fach vergrößert.

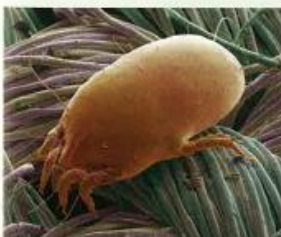

Wir sehen hier eine etwa 170-fache Vergrößerung einer Hausstaubmilbe. Berechne die ungefähre Körpergröße.

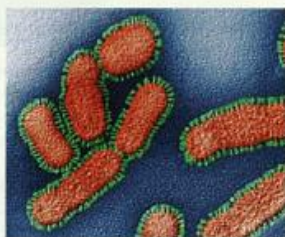

In der Abbildung siehst du Influenzaviren in 200 000-facher Vergrößerung. Finde die ungefähre Länge von Influenzaviren heraus.

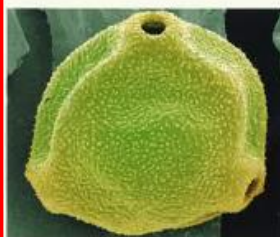

Birkenpollen haben eine Größe von rund 20 µm. Hier sehen wir eine etwa .....fache Vergrößerung.



### **C 1.6 Are differences between viruses and bacteria explained?**

**→ If yes, which ones?**

Here, viruses and bacteria must be compared in detail. Readers do not have to draw conclusions themselves. The differences can be discussed in the text or in figures.

**Example of "Yes" 1 (see Figure S7):** The effectiveness of antibiotics is discussed.



**Tuberkulose-Erreger.** Fieber und Husten können die Krankheit anzeigen. Die Bakterien befallen vor allem die Lunge. Tuberkulose ist lebensgefährlich, wenn der Körper z. B. durch Hunger geschwächt ist.

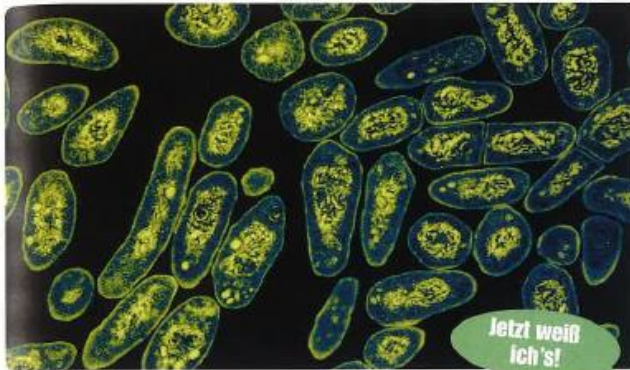

Rechne nach, wie viele Bakterien aus einem einzelnen Bakterium nach fünf Stunden entstanden sind.

○ 1 25 468      ✗ 32 768      ○ 1 898

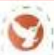

### Wusstest du, dass ...

- die Borreliose durch das Bakterium *Borrelia burgdorferi*, einer Spirille, hervorgerufen wird? Borreliose verursacht Nerven- und Gelenksbeschwerden.
- Bakterien mit einer Länge von 0,002 mm nach einer Stunde eine Kette von 0,008 mm bilden? (Sie teilen sich alle 20 Minuten!) Nach 10 Stunden ist die Kette bereits 1737 km und nach 15 Stunden 70 369 km lang.
- die Darmerkrankung Cholera durch das beistrichförmige Bakterium *Vibrio cholerae* verursacht wird?
- Antibiotika nur bei bakteriellen Erkrankungen helfen, nicht aber bei Viruserkrankungen wie Grippe?

### Die Behandlung von Tetanus

Der Verlauf der Erkrankung hängt vom allgemeinen Gesundheitszustand der Patientin und des Patienten ab. Vielfach reichen die **Abwehrkräfte** des Menschen nicht aus, um die Bakterien abzutöten. Dann müssen spezielle Medikamente, **Antibiotika**, eingenommen werden. Antibiotika sind Stoffe, die von Pilzen gebildet werden. Diese Stoffe hemmen die Vermehrung der Bakterien oder töten sie ab.

Gegen viele bakterielle Erreger kann man sich auch vorbeugend durch eine Impfung schützen. Eine Tetanus-**Schutzimpfung** besteht aus drei Teilimpfungen. Danach ist man gegen Tetanus immun, d.h., der Körper hat Abwehrstoffe gegen Tetanus-Erreger. Eine Auffrischung sollte nach etwa 10 Jahren erfolgen. Bei vielen bakteriellen Erkrankungen befallen die Bakterien die Atemwege. Dazu gehören Diphtherie, Keuchhusten und Tuberkulose. Die Übertragung erfolgt meist durch eine Tröpfcheninfektion beim Husten und Niesen.

### MERKE DIR

Bakterien können Krankheiten verursachen. Durch eine Infektion gelangen sie in den Körper. Dort vermehren sie sich rasch und bilden Giftstoffe. Nach einer Inkubationszeit bricht die Krankheit aus. Antibiotika helfen bei der Abwehr von Bakterien. Für viele bakterielle Krankheiten gibt es eine Schutzimpfung.

### REMEMBER

Bacteria can cause diseases. Through an infection bacteria enter the body. There they reproduce very quickly and create toxic substances. After an incubation period the disease breaks out. Antibiotics help to fight a bacterial illness. Against many bacterial diseases a vaccination exists.

### VOKABULAR

|                 |               |
|-----------------|---------------|
| bacterial       | bakteriell    |
| to cause        | verursachen   |
| disease         | Krankheit     |
| illness         | Krankheit     |
| toxic substance | Giftstoff     |
| vaccination     | Schutzimpfung |

ZELLENLEHRE 17

Figure S6. Expedition Biologie 2 (Schirl & Möslinger, 2017)



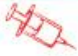

## MEDIZIN AKTUELL

## Viren, Bakterien und Co. –

## die Vielfalt der Krankheitserreger genauer betrachtet

Täglich kommen wir mit unzähligen Krankheitserregern in Kontakt. Nicht immer erkranken wir. Meist werden Krankheitserreger durch das Abwehrsystem erfolgreich bekämpft. Die meisten **Infektionskrankheiten** werden durch Viren und Mikroorganismen (Bakterien, Einzel-

ler, Pilze) ausgelöst. Infektion bedeutet Eindringen der Krankheitserreger. Die Zeitdauer von der Infektion bis zum Ausbruch der Krankheit wird als **Inkubationszeit** bezeichnet. Nicht alle Bakterien, Pilze und Einzeller sind Parasiten (vgl. S. 108, 111).

**Infektionskrankheit** = Krankheit, die meist durch Mikroorganismen oder Viren verursacht wird

| Gruppe                 | Merkmale                                                                                                                                                                                       | Beispiele                                                                                                                                                                                                                               | Abbildung |
|------------------------|------------------------------------------------------------------------------------------------------------------------------------------------------------------------------------------------|-----------------------------------------------------------------------------------------------------------------------------------------------------------------------------------------------------------------------------------------|-----------|
| Viren                  | keine Zellen; bestehen nur aus Erbinformation, die in eine Eiweißhülle verpackt ist                                                                                                            | Grippe (Abb. 109.1), HIV* (AIDS*), Masern, Röteln, Mumps, Polio*, FSME-Viren (durch Zecken übertragen, verursachen Frühsummergehirn(haut)entzündung), Corona-Viren (verursachen COVID-19)<br>109.1 Grippeviren (Vergr. ca. 40 000-fach) |           |
| Bakterien              | bestehen aus einer einfach gebauten Zelle; Erbmaterial nicht im Zellkern, sondern frei im Zellplasma                                                                                           | Salmonellen*, Tetanus* (Abb. 109.2), Typhus*, Karies<br>109.2 Tetanusbakterium (Vergr. ca. 20 000-fach; bildet gerade eine Spore)                                                                                                       |           |
| Prionen*               | Infektiöse Eiweißteilchen, verursachen das Absterben von Zellen; führt zu schwammartigen Löchern im Gehirn (Abb. 109.3)                                                                        | Creutzfeldt-Jakob-Krankheit* (CJD, beim Menschen), Rinderwahn (BSE*, beim Rind)<br>109.3 Gehirngewebe mit schwammartigen Löchern (Vergr. ca. 30-fach)                                                                                   |           |
| Pilze                  | bestehen aus Zellen mit Zellkern und einer Zellwand aus Chitin; zwei Grundformen: Myzel* aus Hyphen* (z. B. Fußpilz), Hefeform (z. B. Soor*)                                                   | Hautpilze (Fußpilz, Nagelpilz), Soor (Hefepilz; weißliche Beläge in der Mundhöhle, Abb. 109.4) Schimmelpilze<br>109.4 Soorinfektion der Mundhöhle                                                                                       |           |
| Einzeller              | bestehen nur aus einer einzigen Zelle; durch Tiere (Malaria: Anophelesmücke*) oder verschmutztes Trinkwasser übertragen (z. B. Amöbenruhr)                                                     | Plasmodien* (Malaria; Abb. 109.5), Amöben*<br>109.5 Plasmodium zw. roten Blutzellen (gelb; Vergr. ca. 1 000-fach)                                                                                                                       |           |
| Würmer                 | Parasiten; ernähren sich z. B. im Darm von der verdauten Nahrung; Übertragung unterschiedlich, z. B. durch Finken* in rohem Fleisch (Bandwurm), durch mit Kot verunreinigte Nahrung (Spulwurm) | Bandwurm, Spulwurm (Abb. 107.6; ♀ bis 40 cm, ♂ bis 25 cm lang)<br>109.6 Spulwurm                                                                                                                                                        |           |
| Spinnentiere, Insekten | Parasiten; leben auf der Körperoberfläche; übertragen beim Blutsaugen Mikroorganismen                                                                                                          | Zecke, Krätzmilbe (Abb. 109.7; ca. 0,4 mm groß), Kopflaus, Menschenfloh<br>109.7 Krätzmilbe                                                                                                                                             |           |

\* Worterklärung auf Seite 150

Figure S7. bio@school 4 (Schermaier et al., 2013).



**Example of "Yes" 2 (see Figure S8):** Here, a wide variety of pathogens and their characteristics are compared in a table. One can see both the differences in structure and size and the various diseases caused by bacteria and viruses.

**Example of "No" 1 (see Figure S9):** Instead of showing differences, diseases are listed here that can be caused by both bacteria and viruses.

Auch **Krankheitserreger** wie Bakterien, Pilzsporen oder Viren werden mit der Atemluft eingeatmet. Sie können zu **Infektionskrankheiten** wie Schnupfen, Husten oder Halsentzündungen führen. Neben diesen harmlosen Atemwegserkrankungen gibt es auch schwerwiegende Erkrankungen, wie diese Tabelle zeigt:

| Erkrankung               | der ...                              | verursacht durch ...                                         | Symptome                                                                               |
|--------------------------|--------------------------------------|--------------------------------------------------------------|----------------------------------------------------------------------------------------|
| <b>Bronchitis</b>        | Infektion der Bronchien              | Bakterien oder Viren                                         | Atemwege schwellen an; Atmen fällt schwer                                              |
| <b>Lungen-entzündung</b> | Infektion der Lunge                  | Bakterien oder Viren                                         | Atemwege schwellen an; Atmen fällt schwer                                              |
| <b>Asthma</b>            | Entzündliche Erkrankung der Atemwege | Allergien oder auch seelische Belastungen                    | krampfhaftes Zusammenziehen der Bronchien; Anschwellen der Schleimhäute; akute Atemnot |
| <b>Tuberkulose</b>       | Infektion der Lunge                  | Bakterien; durch Tröpfchen beim Niesen und Husten übertragen | starker Husten und Atemnot                                                             |

Figure S8. Biologie für alle 4 (Drexler et al., 2016).

**Example of "No" 2 (see Figure 10):** This table "childhood diseases" does not list whether the pathogens are bacteria or viruses.



## 3 Infektionskrankheiten

Darunter versteht man alle ansteckenden Krankheiten, bei denen die Erreger bei der **Infektion** (= Ansteckung) in deinen Körper eindringen. Dort finden sie ideale Bedingungen vor, um sich vermehren zu können.

Die Krankheiten brechen nicht unmittelbar nach der Infektion aus, sondern erst, nachdem sich die Erreger entsprechend vermehren konnten. Die Zeit zwischen Infektion und Ausbruch der Krankheit nennt man **Inkubationszeit**. Ihre Dauer ist charakteristisch für einzelne Krankheiten. Ärztin und Arzt können die Art der Erkrankung an verschiedenen Merkmalen, den sogenannten **Symptomen**, erkennen.

| Infektionskrankheit         | Inkubationszeit in Tagen | Symptome                                                                                                                             | Ansteckung durch            |
|-----------------------------|--------------------------|--------------------------------------------------------------------------------------------------------------------------------------|-----------------------------|
| Diphtherie                  | 2–4                      | Fieber, grauweißer Belag im Rachenraum, Mandeln schwellen an                                                                         | Tröpfchen                   |
| Keuchhusten                 | 7–14                     | krampfartiger Husten                                                                                                                 | Tröpfchen                   |
| Masern                      | 11                       | Fieber, Lichtempfindlichkeit, Katarh, Ausschlag ab dem 3. oder 4. Krankheitstag, Flecken am ganzen Körper (linsengroß, rot, gezackt) | Tröpfchen, direkter Kontakt |
| Mumps                       | 18–21                    | Fieber, Anschwellen der Ohrspeicheldrüsen                                                                                            | Tröpfchen                   |
| Röteln                      | 14–21                    | rote Flecken (linsengroß, rund) vor allem am Rumpf, Fieber                                                                           | direkter Kontakt            |
| Windpocken (Feuchtblattern) | 18–21                    | meist Fieber, rote Flecken, aus denen sich Bläschen bilden                                                                           | Atemluft                    |
| Scharlach                   | 2–4                      | Halsentzündung, Zunge weiß belegt, später himbeerfarben, Hautausschlag                                                               | Atemluft (Tröpfchen)        |

Abb. 1: Wichtige Grundinformationen über häufige „Kinderkrankheiten“

## B&U-FACTS

Das Immunsystem bekämpft Krankheitserreger (Bakterien und Viren). Bestimmte weiße Blutkörperchen fressen Eindringlinge. Andere bilden Antikörper aus, die die Erreger unschädlich machen. Viren brauchen für die Vermehrung lebende Wirtszellen. Erreger von Infektionskrankheiten dringen auf verschiedenen Wegen in den Körper ein. Inkubationszeit: Zeit zwischen Ansteckung und Ausbruch der Krankheit.

- 1 ▶ Besprecht, warum die in Abb. 1 auf Seite 30 genannten Krankheiten Kinderkrankheiten genannt werden!
- 2 ▶ Warum können auch Erwachsene solche Krankheiten bekommen?
- 3 ▶ Suche im Lexikon, ob die genannten Infektionskrankheiten von Viren oder Bakterien ausgelöst werden!
- 4 ▶ An jedem Schultag sitzt du mit deinen Mitschülerinnen und Mitschülern stundenlang in einem Raum. Ist euch bewusst, dass ihr stets von „Wolken“ winziger Bakterien und Viren umgeben seid, die ihr einatmet? Wie kann man auf einfache Weise verhindern, dass die Bakterien im Klassenzimmer immer mehr werden?



### **C 1.7 Is it made clear that antibiotics are not effective against viruses?**

For "Yes", it must be clearly stated that antibiotics are not effective against any virus or viral disease.

**Example of "Yes" 1:** "Since viruses do not have their own metabolism, they cannot absorb any substances. Therefore, antibiotics are ineffective against them." (B & U 4, p. 28; Schullerer & Burgstaller, 2013).

**Example of "Yes" 2 (see Figure S7):** This table states that antibiotics work against bacteria, but not against viral diseases.

**Example of "No" 1:** "Animals in factory farming must be constantly cared for by a veterinarian and treated with antibiotics as a precautionary measure to prevent the spread of diseases. Thus, about half of the world's production of antibiotics is used for factory farming. Nevertheless, diseases such as foot-and-mouth disease or BSE spread rapidly in intensive livestock production." (Biologie für alle 3, p. 146; Drexler et al., 2016).

Unfortunately, the next paragraph (not shown) does not address why antibiotics are ineffective for the diseases mentioned.



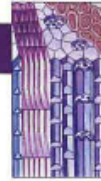

9

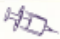

### MEDIZIN AKTUELL

#### Blasenentzündung/Nierenbeckenentzündung

Durch aufsteigende Bakterien (besonders häufig *Escherichia coli*) oder Viren hervorgerufene Entzündung der Harnblase und des Nierenbeckens. Frauen sind häufiger betroffen, weil durch die kürzere Harnröhre und das nahe Beisammenliegen von Harn-

und Afteröffnung *E. coli*-Bakterien aus dem Darm leichter in die Harnwege gelangen als bei Männern. Kennzeichen: Brennen beim Wasserlassen, schmerzhafter Harndrang, gehäuftes Wasserlassen. Behandlung erfolgt mittels Antibiotika.

*Escherichia coli* = Bakterium; *E. coli*; benannt nach dem dt. Arzt Th. Escherich  
Escherich, Theodor = dt. Arzt (1857–1911)

10

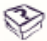

### BIO-CHECK-BOX

#### Exkretion – Nieren

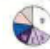

Lösen Sie folgendes Quiz (Ä = AE!)

- Stickstoffhaltiges Ausscheidungsprodukt der meisten Fische
- Stickstoffhaltiges Ausscheidungsprodukt der Vögel
- Fachausdruck für „Nierenverpflanzung“: Nieren...
- Moderne Methode zur Zertrümmerung von Nierensteinen
- Anderer Begriff für Endharn
- Hormon der Niere
- Die meisten Nierensteine bestehen aus Calcium...
- Kapillarknäuel des Nephrons (Einzahl)
- Lat. Bezeichnung für Stickstoff bzw. Herkunft des chemischen Symbols N
- Medizinisches Verfahren, bei dem die „künstliche Niere“ zur Anwendung kommt
- Hauptbestandteil des Harns

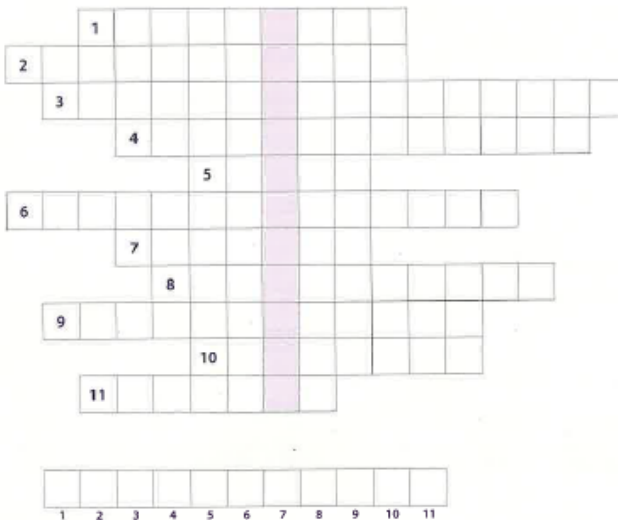

Lösungswort

Name für die Wissenschaft, die sich mit Nierenerkrankungen beschäftigt

**KURZ:  
KNAPP**

#### NIEREN

Sie können ...

- den Aufbau und die Bestandteile der menschlichen Niere darstellen, benennen und ihre Funktion im Hinblick auf das Phänomen „Die Form passt zur Funktion“ (Basiskonzept „Struktur und Funktion“) erklären.
- bestimmte Erkrankungen der Niere und der ableitenden Harnwege benennen und beurteilen.
- die Bildung des Primärharns und Endharns in den Nierenkanälchen erläutern.



**Example of "No" 2 (see Figure S11):** It is explained that bladder infections can be caused by bacteria or viruses and are treated with antibiotics. The information is correct, but misleading due to incompleteness - in the case of viral cystitis, taking antibiotics will not provide relief.

## **C 1.8 Are virus-related diseases mentioned?**

### **→ If yes, which ones?**

Each disease mentioned is counted once. There are some diseases that are suspected to be related to viruses. These diseases are only counted if the assumption is discussed in the textbook. For example, if cancer in general is discussed and viruses are mentioned as a suspected cause, this is counted as "Yes" and "Cancer" is entered in the "Type" field. If the connection is confirmed and widely known (cervical cancer / HPV infection), the disease is counted in any case.

If a virus is mentioned whose name includes the disease name, this is also counted. If, for example, "measles virus" occurs in the text, this is counted on the one hand for C 1.2 and here again as "measles" and listed under "Type".

**Example of "Yes" 1:** "It is possible that type I diabetes is triggered by genetic predisposition, by certain viral infections, or by other environmental factors." (am Puls Biologie 7, p. 52; Fischer et al., 2019)

**Example of "Yes" 2:** "Multiple sclerosis: in this disease, damage occurs to the myelin sheaths of neurons. As a result, impulse conduction is disrupted. The cause is unknown. It is possible that the body's own cells attack the myelin sheaths. But viruses and other environmental factors can also be triggers." (Linder Biologie 6, p. 11; Decker et al., 2017).

Here, the possible link between a viral infection and the onset of multiple sclerosis is discussed.



### **C 1.8.1 Is/are one or more virus-related disease(s) portrayed in detail?**

**→ If yes, which one(s)?**

Here, a “Yes” is given and the corresponding disease is entered in the "Type" field, if not only the name of the disease is mentioned, but additionally at least two other facts (infection route, symptoms, course, therapy, prevention, or the like) are given.

**Example for "Yes" 1 (see Figure S12):** Warts are described in this figure and one wart is shown. A therapy is also addressed.



**Akne**
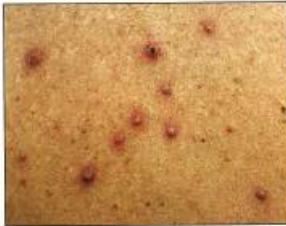

Akne tritt hauptsächlich während der Pubertät und dem frühen Erwachsenenalter auf. Die Ausführungsgänge der Talgdrüsen verhornen, verengen und verschließen sich. Weiters kommt es zu einer vermehrten Talgproduktion. Der Talg kann nicht mehr an die Hautoberfläche abgegeben werden. Es kommt zu Entzündungen und Vereiterungen. Knoten und bleibende Narben können die Folge sein. Die Ursachen für Akne sind vielfältig (z. B. Entzündung der Poren durch Bakterien, durch Hormonaktivität oder Stress). Ärztliche Hilfe sollte in jedem Fall eingeholt werden.

**Hautkrebs (Melanom)**
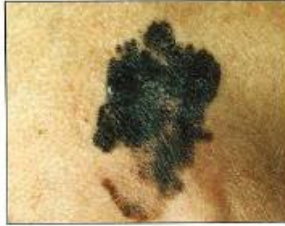

Tumore in der Haut entstehen, wenn Hautzellen sich gut- oder bösartig verändern und ungehemmt teilen. Beim Melanom haben sich pigmentbildende Zellen bösartig verändert. Oft lösen sich Zellen vom Tumorgewebe, werden mit dem Blutstrom transportiert und bilden an anderen Stellen des Körpers Tochtergeschwülste, Metastasen. UV-Strahlung des Sonnenlichtes und der Bräunungslampen können Ursachen dafür sein. Eine regelmäßige Kontrolle hilft bei der Früherkennung: Wenn Pigmentflecken unregelmäßig begrenzt sind, verschieden braune und schwarze Farbtöne haben und sich vergrößern, muss unbedingt ein Arzt/eine Ärztin aufgesucht werden.

**Tätowierung**
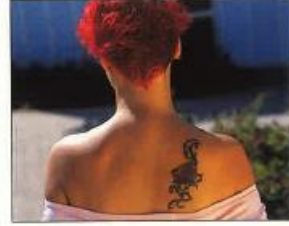

Bei einer Tätowierung werden gefärbte Partikel, wie chinesische Tusche oder Ruß, in das Bindegewebe der Haut eingebracht. Dabei wird die Farbe mit einer Tätowiermaschine mittels Nadeln unter die oberste Hautschicht gestochen und ein Bild oder ein Text gezeichnet. Von Laien vorgenommene Tätowierungen können zu Infektionen oder allergischen Reaktionen führen. Die Hygienebedingungen sind in Tätowierstudios unbedingt zu überprüfen! Die Entfernung von Tätowierungen ist schwierig, aber mit ärztlicher Hilfe möglich. Die Entscheidung für eine Tätowierung sollte sorgfältig und umsichtig überdacht werden.

**Furunkel**
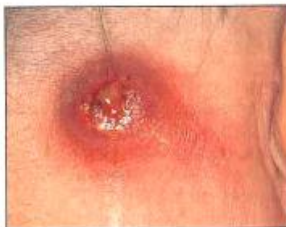

Wenn Stäbchenbakterien (s. Band 2, S. 16) in die Ausführungsgänge der Talgdrüsen oder entlang des Haarbalges eindringen, kann sich dort eine Entzündung ausbilden. Sie wird erkennbar durch einen dicken roten Knoten in der Haut. Durch Eiterbildung kommt es zu einer gelb schimmernden, sehr schmerzhaften Erhebung. Ein Arzt/eine Ärztin sollte aufgesucht werden.

**Piercing**
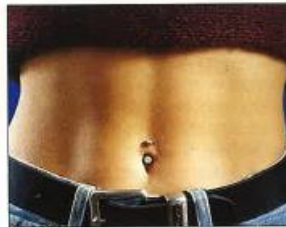

Schmuckstücke aus Metall oder Kunststoffen werden mit Ösen in der Haut verankert, so in Ohrfläppchen, im Bauchnabel oder in den Lippen. Durch den Einstich können Bakterien in die Haut eindringen und eine Infektion auslösen. Durch das Material der Öse kann es zu allergischen Reaktionen kommen. Bei nicht völlig sterilem Arbeiten können auch Erkrankungen wie Hepatitis übertragen werden.

**Warzen**
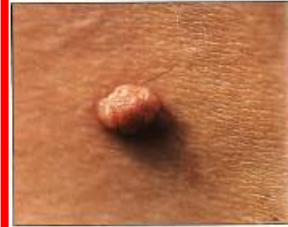

Warzen sind durch Viren hervorgerufene Wucherungen der Haut. Sie sind zumeist halbkugelig und von zerklüfteter Oberfläche. Da sie durch Viren übertragen werden und deshalb ansteckend sind, sollten sie aus medizinischer Sicht entfernt werden. Warzen werden auch aus kosmetischen Gründen entfernt. Dafür ist ein Eingriff durch einen Arzt/eine Ärztin notwendig.



## Nutztiere in der Landwirtschaft

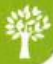

### Geografie

In manchen Ländern werden aus religiösen Gründen keine Kühe gegessen. Wo ist das der Fall?

**Konsum in Österreich.** Die Bäuerin, der Bauer verkauft die Milch an Molkereien, wo sie weiterverarbeitet wird. Jede Österreicherin, jeder Österreicher verbraucht durchschnittlich im Jahr ca. 140 kg Milchprodukte. Milch besteht aus Fetten, Eiweißen, Mineralstoffen, Vitaminen, Wasser und Milchzucker.

[T2 S. 136 (D)]

- 1.5 Auf Milchpackungen im Supermarkt steht, dass die Milch homogenisiert ist. Recherchiere und erkläre, was der Begriff im Zusammenhang mit Milch bedeutet!
- 1.6 Erstelle zu zweit eine Liste mit möglichst vielen Produkten, die aus Kuhmilch hergestellt werden!

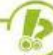

Eine Österreicherin oder ein Österreicher isst ca. 66 kg Fleisch im Jahr.

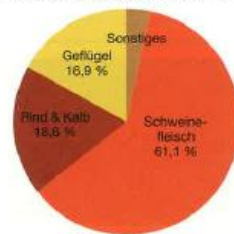

56.1 Jährlicher Fleischkonsum pro Österreicherin, pro Österreicher in Prozent

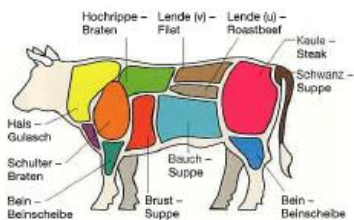

56.2 Fleischpartien des Rindes und ihre Verwendung

[T2 S. 138 (D)]

- 1.7 Wie viel kg Rindfleisch konsumiert eine Österreicherin, ein Österreicher pro Jahr? Notiere deine Rechnung!

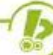

**Beim Kauf von Fleisch auf dessen Herkunft achten.** Moderne Massentierhaltung wird den Bedürfnissen der Tiere angepasst. Das Fleisch könnte jedoch aus einer nicht-österreichischen Massentierhaltung stammen, die der artgerechten Haltung nicht entspricht. Die Tiere stehen auf engstem Raum und werden **gemästet**, damit möglichst schnell ein hoher Ertrag erzielt werden kann. Die Fütterung erfolgt vollautomatisch. Der Boden ist hart und hat meistens Spalten oder andere Vorrichtungen, damit Kot und **Gülle** abfließen können. Das Ausmisten muss so nicht von Menschen verrichtet werden. Durch den für die Tiere ungünstigen Boden und das Gedränge kommt es leicht zu Verletzungen, z. B. an den Hufen.

**mästen:** füttern und aufziehen bis zur Schlachtung

**Gülle:** vorwiegend Urin von Nutztieren

**BSE:** Rinderwahnsinn; Erkrankung, bei der sich das Gehirn auflöst und dabei zerstört wird

**Maul-und-Klauen-Seuche:** ansteckende Viruserkrankung bei Rindern, die schmerzvolle Veränderungen an Maul und Klauen verursacht

**Krankheiten.** Im Dezember 2001 gab es in Österreich den ersten BSE-Fall. Tierärztinnen und Tierärzte untersuchen Rinder laufend auf diese Krankheit. Es waren bisher acht Rinder an BSE erkrankt. Das ist im Vergleich zu anderen Staaten sehr wenig. Eine andere Krankheit, von der Rinder befallen werden können, ist die **Maul-und-Klauen-Seuche**. Diese Tierseuche ist in Österreich schon lange nicht mehr ausgebrochen. Es gibt allerdings Krisenpläne, z. B. auf der Homepage des Bundesministeriums für Gesundheit, die genau beschreiben, welche Maßnahmen im Ernstfall ergriffen werden müssen, damit eine Verbreitung der Krankheit verhindert werden kann.



**Example for "Yes" 2 (see Figure S13):** In this section, foot-and-mouth disease is presented with symptoms, occurrence in Austria and what to do in case of occurrence.

**Example of "No" 1:** "The state conducts free vaccination campaigns against some diseases (e.g., polio, tetanus)." (Vom Leben 1, p. 29; Cholewa et al., 2010).

No further information about polio is provided either directly afterward or elsewhere in the textbook.

**Example of "No" 2:** "The diseases common cold, influenza, polio, jaundice (hepatitis), rabies, and AIDS are examples of viral infections." (BioTOP SB 4, p. 48; Jilka & Kadlec, 2017).

None of the diseases mentioned are described in detail and would thus not be counted. [However, the common cold, polio, and AIDS are discussed in depth elsewhere, and are thus counted there.]

### **C 1.9 Are preventive measures addressed to avoid infection with viruses?**

**→ If yes, which ones?**

A positive rating requires a description of how to avoid a virus infection.

**Example of "yes" 1 (see Figure S14):** Several preventive measures to avoid infection with HIV are discussed here: disposable gloves and a resuscitation wipe when giving first aid, hygiene in other situations with possible blood contact, and using condoms during sexual intercourse. It is also pointed out that there may be other measures in the future, such as curative medication or vaccines.



## Mensch

### ➤ Behandlung einer HIV-Infektion

Eine HIV-Infektion kann noch nicht geheilt werden. Mit den heute verfügbaren Medikamenten-Kombinationen kann das Ausbrechen der Erkrankung aber hinausgezögert oder es können die Krankheitssymptome gemildert werden.

Zurzeit ist noch nicht absehbar, ob und wann es je einen Impfstoff oder ein Heilmittel gegen das HI-Virus geben wird, da sich HI-Viren sehr schnell verändern. Deshalb kann der Wirtsorganismus keine wirksamen Antikörper und Gedächtniszellen bilden.

Daher ist es sehr wichtig, dass du dich vor einer Infektion schützt.

### ➤ Wie schützt du dich vor einer Ansteckung mit HIV?

Den Kontakt mit Blut zB bei der Ersten Hilfe kann man durch die Verwendung von Einmalhandschuhen vermeiden. Verwende bei der Beatmung stets ein spezielles Beatmungstuch! So bist du gut vor Kontakt mit den Körperflüssigkeiten geschützt.

Durch sachgerechte **Hygienemaßnahmen** beim Arzt, im Krankenhaus, beim Friseur, bei der Nagelpflege sowie beim Piercing und beim Tätowieren ist eine Infektion durch Fremdblut nahezu ausgeschlossen. Achte darauf, wenn du dir ein Piercing oder ein Tattoo machen lassen willst, dass die Hygienemaßnahmen eingehalten werden!

Beim Geschlechtsverkehr ist der beste Schutz **Safer Sex**. Verwende deshalb immer ein Kondom (→ B 3, siehe Seite 88)! So kann kein Sperma bzw. Scheidensekret in den Körper der Partnerin/des Partners gelangen und das Infektionsrisiko wird deutlich verringert. Auf Kondome sollte in einer Partnerschaft erst dann verzichtet werden, wenn sichergestellt ist, dass keiner der Partner mit dem HI-Virus infiziert ist. Dies lässt sich mit einem HIV-Test feststellen, der zB bei einer Blutspende routinemäßig vorgenommen wird.

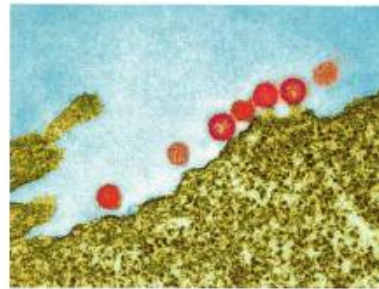

B 2 Von HI-Viren befallene Zelle des Immunsystems (grün): Neue Viren (rot außen an der Zelle) werden freigesetzt.

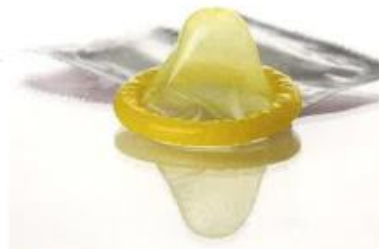

B 3 Die Verwendung eines Kondoms schützt auch vor einer HIV-Infektion.

### ➤ Welche Kontakte mit Erkrankten sind ungefährlich?

Bei alltäglichen Kontakten am Arbeitsplatz oder in Schulen besteht keine Ansteckungsgefahr. Der Speichel, die Tränenflüssigkeit, der Harn und der Kot enthalten nur geringe Mengen an HI-Viren. Diese reichen für eine Ansteckung nicht aus. Daher ist eine Ansteckung beim täglichen Umgang miteinander nicht möglich. Auch der soziale Kontakt mit einer HIV-infizierten Person ist also nicht gefährlich. HIV-Infizierte dürfen nicht ausgegrenzt werden! Sie benötigen Verständnis für ihre schwierige Situation.

### Zusammenfassung

Die Immunschwächekrankheit AIDS wird durch das HI-Virus hervorgerufen. Sie kann noch nicht geheilt werden. Es gibt auch keinen Impfstoff dagegen. Schütz dich vor einer Ansteckung! Vermeide den Kontakt mit fremdem Blut, indem du bei der Ersten Hilfe Einmalhandschuhe verwendest! Verwende beim Geschlechtsverkehr immer ein Kondom!

## Mach mit

- 1 Finde heraus, wie viele Menschen zurzeit weltweit mit dem HI-Virus infiziert sind. Wie viele davon gibt es in Österreich?
- 2 Finde anhand einer Statistik heraus, in welchen Regionen der Welt es besonders viele HIV-Infizierte und auch Neuinfektionen gibt.
- 3 Erkläre, über welche Ansteckungswege sich Menschen infizieren können.



**Example of "Yes" 2:** "Ticks are carriers of pathogens. In the case of early summer meningitis (caused by TBE-viruses as pathogens), severe cases can lead to paralysis, brain damage and even death. You should not dismiss the risk of getting sick lightly! The safest protection is definitely vaccination. Any doctor can vaccinate you. A regular booster vaccination is necessary. Unvaccinated, you should avoid places where ticks are present." (Vom Leben, p. 88; Cholewa et al., 2010). Here, the two measures mentioned ("vaccination" and "distance / contact avoidance") are entered in the "Type" field and counted as 2 in the "Number" field.

#### **C 1.10 Is vaccination addressed?**

##### **→ If yes, which one(s)?**

If the answer to the main question is "yes", the vaccinations mentioned are then entered in the field "type". Only vaccinations against viruses are counted, not those against bacteria. If the pathogen is not specified, "vaccination in general" is entered. In the case of multiple vaccinations, all are counted individually.

If vaccinations are reported that are currently being researched, as in Figure 14, they are not counted here.

**Example of "Yes" 1:** "The safest protection is definitely vaccination. Any doctor can vaccinate you. A regular booster vaccination is necessary. Unvaccinated, you should avoid places where ticks are present." (Vom Leben 2, p. 88; Cholewa et al., 2010). TBE vaccination is entered here in the "Type" field.

**Example of "Yes" 2 (see Figure S15):** Vaccinations against the listed viral diseases are entered in the "Type" field. In this example, they include polio,



hepatitis B, rotavirus, mumps, measles, rubella. Therefore, "6" is entered in the field "Number".



**36**

Der Mensch: Immunsystem

# Die Immunisierung

**Erforsche!**

**Impfungen**  
 Der englische Arzt Edward Jenner (1749–1823) beobachtete, dass Menschen, die häufig Kontakt zu Kühen hatten, oft an Kuhpocken erkrankten, jedoch fast nie an Menschenpocken. Er wagte im Mai 1796 ein Menschenexperiment: Er impfte. Er übertrug die Flüssigkeit von einer Pockenpustel einer Melkerin, die an Kuhpocken erkrankt war, in einen kleinen Hautritz des achtjährigen Sohnes seines Gärtners. Daraufhin erkrankte der Junge an Kuhpocken. Als der Junge wieder gesund war, machte Jenner den wesentlich riskanteren Teil des Versuchs. Jenner infizierte den Jungen auf die gleiche Weise mit Menschenpocken. Das Kind erkrankte nicht. (Verändert nach: <https://www.wasistwas.de/archiv-wissenschaft-details/edward-jenner-der-entdecker-der-pockenimpfung.html>) Beschreibe mögliche Ursachen dafür. Erkläre, ob du diese Art von Experiment richtig findest, auch dem Buben gegenüber.



① **Aktive Immunisierung.** ② – ⑥ Behandlung zur Abschwächung der Erreger; ⑦ fertiger Impfstoff; ⑧ Impfung; ⑨ Bildung von Antikörpern; ⑩ Bildung von Gedächtniszellen

| Alter         | Impfung                                                                                                                                                                                                                                                                                                                                                                                                                      |
|---------------|------------------------------------------------------------------------------------------------------------------------------------------------------------------------------------------------------------------------------------------------------------------------------------------------------------------------------------------------------------------------------------------------------------------------------|
| 3. Monat      | 6-fach-Impfung: Diphtherie (Erkrankung vor allem des Rachenbereiches, Husten), Wundstarrkrampf, Keuchhusten, Kinderlähmung, <i>Hämophilus infl. B</i> (verursacht Erkrankungen der Atemwege, bei Kleinkindern Gehirnhautentzündung), Hepatitis B (Leberentzündung), Pneumokokken (Erreger der Lungenentzündung)<br>Rotavirus (verursacht Durchfallerkrankungen; 2. bzw. 3. Teilimpfungen im Abstand von mindestens 4 Wochen) |
| 5. Monat      | 2. Impfung: 6-fach-Impfung; 2. Impfung Pneumokokken                                                                                                                                                                                                                                                                                                                                                                          |
| 12. Monat     | 3. Impfung: 6-fach-Impfung<br>3. Impfung: Pneumokokken                                                                                                                                                                                                                                                                                                                                                                       |
| 2. Lebensjahr | 3-fach-Impfung: Mumps, Masern, Röteln; 2 Impfungen im Abstand von mindestens 4 Wochen                                                                                                                                                                                                                                                                                                                                        |
| 7. Lebensjahr | 4-fach-Impfung: Diphtherie, Wundstarrkrampf, Keuchhusten, Kinderlähmung<br>Nachholen der Masern, Röteln, Mumps-Impfung bei Ungeimpften                                                                                                                                                                                                                                                                                       |
| 12. Jahr      | Hepatitis B/Auffrischung oder Grundimmunisierung<br>Meningokokken (Erreger der Gehirnhautentzündung)                                                                                                                                                                                                                                                                                                                         |

② **Österreichischer Impfkalender**

### Aktive Immunisierung

Du bist höchstwahrscheinlich gegen verschiedene Erkrankungen wie Diphtherie, Keuchhusten, Tetanus und Kinderlähmung geimpft. Was passiert bei einer Impfung? Krankheitserreger oder ihre Antigene werden so weit verändert, dass sie für den Körper unschädlich sind, also keine Krankheitssymptome hervorrufen. Diese werden mittels eines Impfstoffes in den Körper injiziert. Dadurch wird das Immunsystem angeregt, Antikörper gegen die Antigene zu bilden. Wie bei einer tatsächlich überstandenen Krankheit entstehen dabei **Gedächtniszellen**. Bei einer späteren Infektion mit dem speziellen Krankheitserreger kann der Körper sofort Antikörper dagegen bilden. Die Krankheit kommt gar nicht zum Ausbruch. Da der Körper im Fall einer **Schutzimpfung** die Antikörper selbst bildet, spricht man von einer aktiven Immunisierung.

Häufig wird mit der ersten Impfung eine erste Immunisierung erreicht. Erst mehrere Auffrischungsimpfungen bieten einen völligen Schutz. Das ist bei Tetanus, Hepatitis B und der FSME-Impfung (der Zeckenschutzimpfung) der Fall. Der Impfschutz lässt meist nach einiger Zeit nach, da keine Gedächtniszellen mehr gebildet werden. Eine Auffrischungsimpfung ist notwendig. Manche Impfungen verleihen eine lebenslange Immunität. Das ist bei der Masernschutzimpfung der Fall.

### „Passive Immunisierung“

Die „passive Immunisierung“ wird auch **Heilimpfung** genannt. Sie wird bei Personen angewandt, die bereits an einem speziellen Krankheitserreger erkrankt sind und bei denen die eigenen Abwehrkräfte

Figure S13. Expedition Biologie 4 (Schirl & Möslinger, 2015).



**Example of "No" 1:** "AIDS research is ongoing worldwide. Intensive research for a vaccine is proving extremely problematic because of HIV's propensity to mutate. To date, it has only been possible to develop drugs that - consistently taken for life - prevent the multiplication and spread of HIV in the body." (Begegnungen mit der Natur 6, p. 143; Biegl, 2018).

**Example of "No" 2 (see Figure S14).** The possibility that HIV-vaccination may be available one day is mentioned.

#### **C 1.10.1 Is a distinction made between active and passive immunization?**

For a "yes", it is not sufficient that passive and active vaccinations are named among the listed vaccinations. Differences must be explained in the text or with an illustration.

**Example of "Yes" 1 (see Figure S16):** In addition to the explanation in the main text, in this textbook, as in some others, active and passive immunization are explained graphically.

**Example of "Yes" 2 (see Figure S17):** In this textbook, active and passive immunization are explained in illustrations, too. Compared to Figure 16, however, these graphics seem less comprehensible.



### Fieber – eine natürliche Waffe

Fieber ist ein wichtiges Instrument deines Immunsystems, um Krankheitserreger unschädlich zu machen. Dabei wird der „Soll-Wert“ für die Körpertemperatur im Gehirn nach oben verstellt, deine Körpertemperatur steigt über 37 °C: Du frierst bei Zimmertemperatur, deine Haut rötet sich und du bekommst evtl. auch Schüttelfrost.

Fieber behindert die Vermehrung der Krankheitserreger in deinem Körper. Nun hat dein Immunsystem die Chance, die verbliebenen Erreger zu vernichten.

Sind die Krankheitserreger bekämpft, stellt dein Gehirn den Sollwert wieder auf „normal“ (37 °C) – deine Genesung beginnt.

### Impfung statt Erkrankung

Manche Erkrankungen sind lebensbedrohend. Die einen werden von Viren ausgelöst (Kinderlähmung, die von Zecken übertragene Gehirnhautentzündung), andere von Bakterien (z. B. Wundstarrkrampf, Diphtherie). Gegen solche Erkrankungen können Impfungen vorbeugen (aktive Immunisierung).

Ist eine Krankheit bei jemandem bereits ausgebrochen, so kann eine Heilimpfung den Körper bei der Abwehr der Erreger unterstützen (passive Immunisierung).

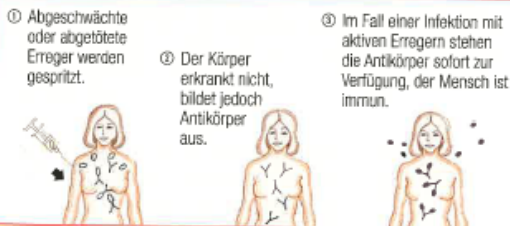

Abb. 1: Aktive Immunisierung

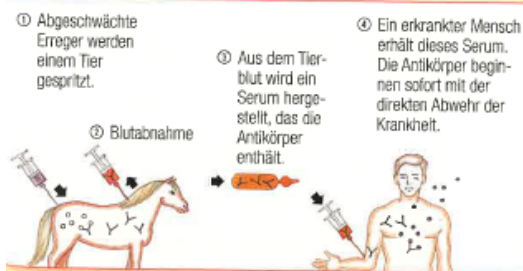

Abb. 2: Passive Immunisierung

### Warum eine Schutzimpfung nicht immer wirkt

Jeder Antikörper hat Kontaktstellen, die nur zu ganz bestimmten Oberflächen von ganz bestimmten Krankheitserregern passen – so wie ein Schlüssel zu einem Schloss. Verändert sich die Oberfläche eines Virus auch nur geringfügig, so sind die bestehenden Antikörper wirkungslos.

Die Viren der saisonalen Grippe (Influenza) haben die Eigenschaft, alljährlich mit „neuen“ Oberflächen wiederzukehren. Aus diesem Grund verliert eine Grippeimpfung nach einem Jahr ihre Wirkung.

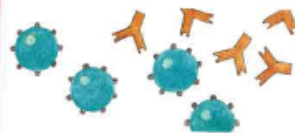

Abb. 3: Zu den eingedrungenen Grippenviren werden passende Antikörper hergestellt.

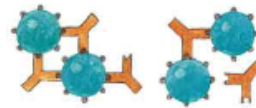

Abb. 4: Sie „docken“ an die Viren an und machen sie unschädlich.

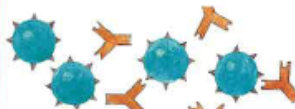

Abb. 5: Wenn neue Grippenviren mit veränderter Oberfläche eindringen, wirken die alten Antikörper nicht mehr. Passende müssen erst neu gebildet werden.

1 ▶ Erkundige dich, was FSME bedeutet und wodurch die Krankheit übertragen wird! Welche Impfmaßnahmen werden vorgeschlagen? Besorge dir eine FSME-Verbreitungskarte und schau nach, ob dein Schulort innerhalb gefährdeter Gebiete liegt! Berichte!

2 ▶ Kontrolliere deinen Imp/pass! Welche Schutzimpfungen sind eingetragen? Wann sind die nächsten Auffrischungsimpfungen fällig?

3 ▶ Frage deine Eltern, welche Kinderkrankheiten du hattest und wie sie verlaufen sind!



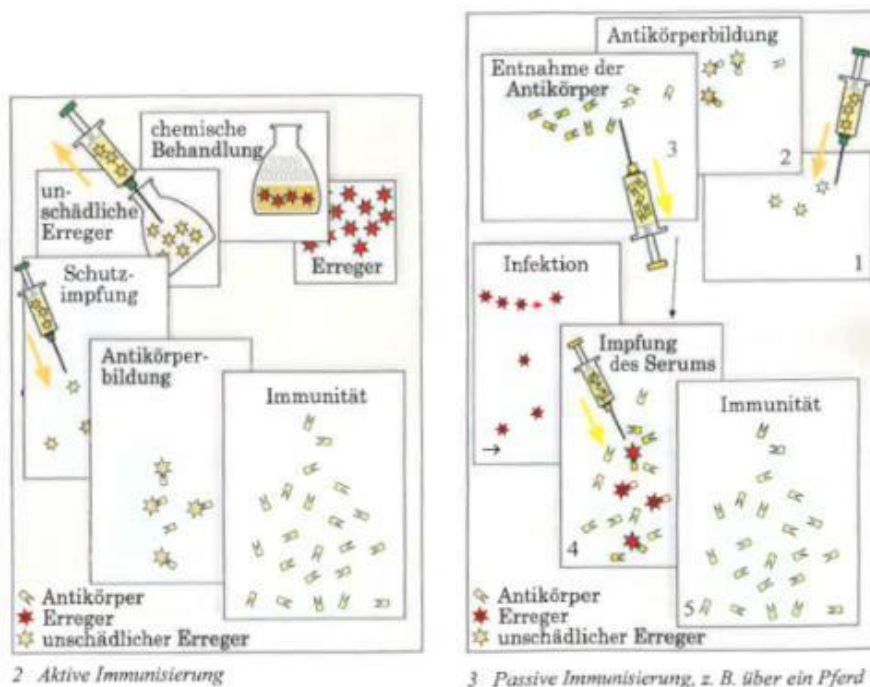

Figure S15. Welt des Lebens 4 (Hännl & Kopeszki, 2019).

### C 1.11 Are different routes of infection presented?

➔ If yes, which ones?

Each route of infection mentioned is counted once. Here, the distinction made in the textbook is crucial, e.g., when different situations are described, in which an infection can occur via bodily fluids.

**Example of "Yes" 1:** "Hepatitis A viruses are often transmitted when hygiene is poor (e.g., contamination of food with feces and urine). Transmission of the much more dangerous forms B and C can occur through contact with blood and/or during unprotected sexual intercourse." (BIO Buch 4 neu, p. 10; Kugler & Auer, 2016).



Here, "contaminated food, contact with blood, unprotected sexual intercourse" are entered in the "Type" field, and "3" in the "Number" field.

**Example of "Yes" 2:** "Various pathogens such as viruses or bacteria can be transmitted by tick bites." (Expedition Biologie 2, p. 48; Schirl & Möslinger, 2017).

Here, the infection route "animal bite" is entered in the "Type" field.

### **C 1.12 Is the multiplication of a virus in the host (replication) explained?**

#### **→ If yes, for which virus?**

To score positively in this category, it is sufficient if at least two of the replication steps are mentioned. The name of the virus is entered in the "Type" field; if a non-specific description is given that is generally valid for viruses, "Virus, generic" is entered here.

**Example of "Yes" 1:** "Since viruses have no metabolism of their own, they are forced to invade living cells and replicate there. HI viruses infect T helper cells, for example, which carry receptors on their surface to which the virus docks. It then enters the cell and begins to replicate. The newly formed viruses leave the cell and infect new cells." (bio@school 6, p. 71; Schermaier et al., 2016).

At least, the first and last steps of replication are described here, so a "Yes" is given.

**Example of "Yes" 2:** "Viruses can only replicate in living cells. When they infect a host cell, they cause it to produce new viruses instead of its own cellular components. The host cells die and burst. The viruses that are released can now infect new cells." (Über die Natur 2, p. 19; Dobers et al., 2011).



**Example of "No":** "Viruses as pathogens: in order to multiply, they must penetrate host cells, e.g., cold viruses enter the cells of the nasal mucosa, HI viruses white blood cells. Vaccinations are available against viral diseases. Viral diseases can be fought with antivirals." (bio@school 4, p. 101; Schermair et al., 2013).

In this textbook, only the penetration into the host cell is addressed, the other steps of replication are missing.

### **C 1.12.1 Is multiplication in the host explained in detail?**

#### **→ If yes, for which virus?**

For "Yes", all steps of replication must be described or shown graphically.

**Example of "Yes" 1 (see Figure S18):** In addition to the comprehensive description in the text (shown there), a detailed illustration is provided.

**Example of "Yes" 2:** "The flu virus first attaches itself to a mucous membrane cell of the respiratory tract. Forming a vesicle, the virus enters the cell. Now the virus strips off its protein coat and releases its genetic material. The genetic material of the virus enters the cell nucleus of the host cell. As a result, the host cell completely adapts to the virus by taking over the metabolism for the virus. It produces virus proteins and replicates its genetic material. The virus components accumulate under the cell membrane of the host cell, are assembled there, and leave the host cell." (Erlebnis Natur 4, p. 80; Jütte & Schirl, 2010).



## Viren werden in ihrer Wirtszelle vermehrt

Viren nutzen für ihre Vermehrung die molekularen Vervielfältigungsprozesse im Kern und/oder im Zytoplasma der von ihnen befallenen Wirtszellen

Viren sind intrazelluläre Parasiten. Folglich müssen sie für ihre Vermehrung in ihre Wirtszelle eindringen (→ Abb. 11, 12). Das geschieht bei allen Viren mit folgendem Ablauf:

- 1) Anheften an die Wirtszelle
- 2) Eindringen in die Wirtszelle (Endozytose) und Freilegen des viralen Erbguts oder Injektion des Erbguts in die Wirtszelle
- 3) Synthese regulatorischer Proteine (für die Vermehrung des viralen Erbguts)
- 4) Synthese viraler DNA oder RNA mit Hilfe von Wirtsenzymen
- 5) Synthese von Strukturproteinen (für die Herstellung des Capsids) mit Hilfe von Wirtsenzymen
- 6) Zusammensetzung der neuen Viruspartikel
- 7) Freisetzen der neuen Partikel aus der Wirtszelle.

Je nach Virus gibt es dabei aber gravierende Unterschiede: **Viren mit DNA** als Erbgut nutzen bestimmte Enzyme im Zellkern ihrer Wirte für die Vermehrung (Replikation) der viralen DNA. Einzig bei Pockenviren, die eigene Replikationsenzyme besitzen, wird die DNA im Zytoplasma der Wirtszellen vermehrt.

**Viren mit RNA** als Erbgut werden überwiegend im Zytoplasma ihrer Wirtszellen synthetisiert. Doch auch hier gibt es Ausnahmen: Influenza-(Grippe)-Viren lassen sich im Zellkern ihrer Wirtszellen die neuen Viruspartikel mit Hilfe bestimmter Enzyme zurechtschneiden.

Dann gibt es noch Retroviren (Kurzform für Reverse Transkriptase Onkoviren). Der Name kommt von einem Enzym, der Reversen Transkriptase, welches das RNA-Erbgut des Virus in DNA umschreibt (→ S. 37). Manche von ihnen erzeugen Krebs (griech. „onkos“ = Anschwellung). Zu ihnen gehört HIV. Diese DNA wird dann in die DNA der Wirtszelle eingebaut und bringt sie dazu, neue virale RNA herzustellen. So entstehen letztlich wieder RNA-Viren (siehe Abb. 17, S. 37).

Virales Erbgut, das in die DNA der Wirtszelle eingebaut wurde, wird auch bei deren Teilung vermehrt, sofern die Zelle nicht durch die Freisetzung von Viruspartikeln stirbt. Manche Viren stimulieren die Zellteilung und können dadurch Krebs verursachen, beispielsweise einige Typen des Humanen Papilloma Virus (HPV).

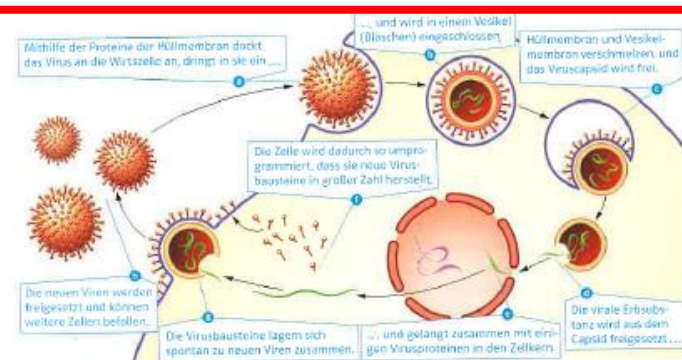

Abb. 11: Vermehrungszyklus eines Grippevirus. Grippeviren beinhalten je nach Typ sieben oder acht einzelne RNA-Moleküle. Ihre RNA wird im Zellkern der Wirtszelle vermehrt, aber nicht in das Erbgut der Wirtszelle eingebaut.

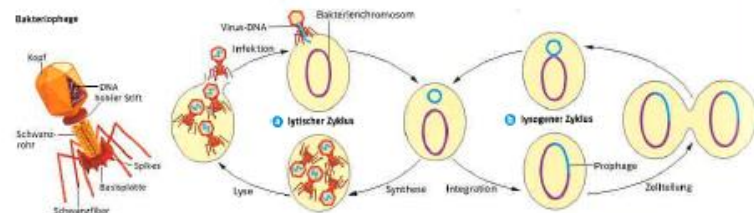

Abb. 12: Vermehrungszyklus von Bakteriophagen (DNA-Viren, die Bakterien befallen). Bakteriophagen heften sich mithilfe von Spikes und Schwanzfibrillen an die Wirtszelle an und injizieren ihre DNA. In der Wirtszelle werden neue Bakteriophagen gebildet. Beim lytischen Zyklus (a) wird die Zelle zerstört, beim lysogenen (b) bleibt sie erhalten.



**Examples for "No":** In both “Yes” examples for the main category C 1.12 (p. 22), some steps of replication are missing.

**C 1.13 Are viruses also presented in a context other than just as causal agents of diseases?**

**→ If so, in which context?**

If viruses are mentioned in a neutral or positive context, e.g., the use of viral vectors in gene therapy, this counts as a “Yes” for this category.

**Example of "Yes" 1 (see Figure S19):** On this page, viruses are shown as vectors in somatic gene therapy.

**Example of "Yes" 2:** "If there is a gene damage in a cell, one can try to correct it by introducing the intact gene into this cell. Retroviruses, adenoviruses or liposomes (fat globules) serve as vectors. In the case of viral vectors, the viral genome must be modified so that the virus cannot replicate in the host cells, otherwise it would destroy the cells." (Biologie 8, p. 90; Hofer & Salzburger, 2011).



## Stammzelltherapie und virale Genfähren – Chancen und ...

Bei der Gentherapie wird ein funktionierendes Gen mittels viraler Vektoren in das Genom eines Menschen eingesetzt

Könnte man die Gentechnik nutzen, um genetisch bedingte Krankheiten zu heilen? Bereits um die Jahrtausendwende herum gab es Therapieansätze für Kinder, die an **X-chromosomal schwerer kombinierter Immundefizienz (X-SCID)** litten. Sie müssen in einer sterilen Umgebung leben, da ihr Immunsystem nicht funktioniert, und haben eine kurze Lebenserwartung.

Den Kindern wurden **blutzellbildende Stammzellen** entnommen, die man von einem entschärften Virus infizieren ließ. „Entschärft“ heißt, dass krankmachende Gene aus dem Erbgut des Virus entfernt wurden.

Die virale Gentherapie nutzt die Fähigkeit von Viren, ihr Erbgut in das Genom der befallenen Wirtszelle einzusetzen.

In diesem Fall ging es um das Gen *IL-2RG*. Es stellt einen Rezeptorteil her, der für die Bildung von Abwehrzellen entscheidend ist. Erfolgreich transformierte Blutstammzellen gelangten danach per Infusion zurück in den Körper der jungen Patienten und konnten dort die Entwicklung eines normalen Immunsystems in Gang bringen (→ Abb. 21).

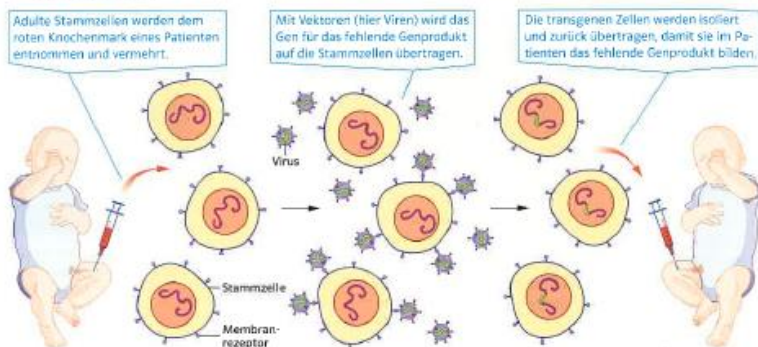

Abb. 21: Bei der somatischen Gentherapie werden teilungsfähige Körperzellen entnommen, transformiert und übertragen.

## ... Risiken

Der unkontrollierte Einbau eines Gens mittels Genfähren kann Krebs hervorrufen

Allerdings erkrankten einige der behandelten Kinder an **Leukämie**. Denn bei der viralen Gentherapie kann man nicht kontrollieren, wo ein Gen eingebaut wird. Möglicherweise bewirkte der Einbau von *IL-2RG* in der Nähe eines Promotors von einem Krebs-fördernden Gen dessen Anschalten.

Neuere Genfähren scheinen dieses Risiko zu mindern. Alternativ werden virale Genfähren verwendet, die das gewünschte Gen nicht in das Wirtsgenom einbauen, sondern es als **Episom** (eigenständiges genetisches Element) im Zellkern hinterlassen. Diese Therapie muss jedoch alle paar Jahre erneuert werden, weil ein Episom als Fremdkörper von der Zelle nicht vermehrt wird.

Dennoch besteht auch hier ein weiteres Risiko: War die Patientin/der Patient bereits zuvor mit einem vergleichbaren Virus in Kontakt genommen, kann es aufgrund der hohen Viruszahl bei der Therapie zu einer potentiell tödlichen Immunreaktion kommen.

Daher wird in der Gentherapie seit einiger Zeit nach Alternativen gesucht, etwa dem Einsatz von **Plasmiden oder Oligonukleotiden** (zB bei zystischer Fibrose oder Diabetes). Im Jahr 2017 analysierte ein US-amerikanisches Forschungsteam dazu über 300 Studien (Hardee et al., 2017. *Advances in non-viral DNA vectors for gene therapy*. *Genes*; 8: 65). Diese Alternativen befinden sich noch in der Erprobung, scheinen aber deutlich sicherer und einfacher in ihrer Anwendung zu sein.

### Aufgabe

**W 1** Liste in Form einer Tabelle auf, was der *Agrobacterium*-vermittelte und der virale Gentransfer gemeinsam haben, und worin sie sich unterscheiden.

130



**Example of "No" 1:** "For example, in the genetic engineering production of vaccines against hepatitis B and human papilloma virus, yeast cells are used as hosts: The DNA section containing the blueprint for the protein that triggers an immune response as an antigen is isolated from the respective viral DNA (see *Begegnungen mit der Natur*, Volume 6). It is integrated into a plasmid of baker's yeast." (*Begegnungen mit der Natur* 8, p. 87; Biegl, 2015).

This example describes the production of a vaccine using viral components. The connection seems positive, but the virus still functions as a pathogen.

**Example of "No" 2:** "For example, another desired trait in plants is to produce a special insecticide, a poison against feeding pests. Genetically engineered corn plants can do that against the corn borer. If corn borers eat these plants, they perish. This works similarly for virus- or fungus-resistant plants. Sugarbeet can be attacked by the *Rhizomania* virus. Plants made resistant by genetic engineering are not affected by it." (Schirl & Möslinger, 2015).

Here, viruses occur in association with genetically engineered plants. However, the role of the virus remains that of a pathogen.

#### **C 1.14 Is the text free of content mistakes?**

##### **➔ If not, which mistakes occur?**

If mistakes other than concerning language are found when reading virus-related sections of a textbook, they are listed here.

In the case of new scientific findings, it can be mentioned in notes whether these were already known in the year of publication of the textbook.



**Example of "No":** "Did you know that... a condom is also a protection against sexually transmitted pathogens such as AIDS? AIDS is a disease of the immune system." (Expedition Biologie 1, p. 39; Schirl & Möslinger, 2015).

In the first sentence, AIDS is referred to as a pathogen, which is incorrect.

### **C 1.15 Is the virus-related content addressed comprehensive?**

#### **→ If not, which details are missing?**

If incompleteness is noticed when reading the virus-related sections of a textbook, these are to be listed here. Only the topics addressed will be scored for completeness.

**Example of "No":** "Condoms also protect against AIDS. AIDS is an incurable disease whose pathogen is transmitted primarily through sexual intercourse." (Gemeinsam Biologie 1, p. 52; Steiner & Wenzl, 2017).

There is no mentioning of the fact that the pathogens that cause AIDS are viruses.

## **C 2 – Illustrations**

### **C 2.1 Do illustrations of individual viruses exist?**

#### **→ If yes, of which viruses?**

Here, illustrations of single viruses are counted. Each virus is counted separately. If there are several illustrations of the same virus, the most detailed one is scored (further illustrations are noted in "Notes"). In the "Type" field, virus name and type of illustration (drawing, electron micrograph) is entered. For example, if both a schematic drawing and an electron micrograph of an influenza virus are displayed, "1" is entered in the "Number" field, and



"influenza (drawing, EM)" is entered in the "Type" field. The following sub-items are filled in for the most detailed of the figures.

#### **C 2.1.1 Are illustrations scientifically correct?**

**→ If not, which ones are not?**

All electron micrographs are classified as correct. Drawings may be incorrect.

**Example of "Yes" 1 (see Figure 6 - C 1.4).**

**Example of "Yes" 2 (see Figure S20).** However, it is not mentioned in the text, which virus is shown. Thus, "virus, generic" is entered in the field "Type".

#### **C 2.1.2 Are illustrations complete/comprehensive?**

**→ If not, which ones are not?**

Electron microscopic images are generally rated as complete. For drawings, both surface and interior of the virus must be shown for a "Yes".

**Example of "Yes" (see Figure S20).**

**Example of "No" (see Figure S21):** Here, an influenza virus is shown for a comparison of sizes. The image is so small that no details are visible. Since the various objects in this illustration are not shown to true scale, a more detailed representation of the virus would have been possible here.



## Viren

Viren sind kleiner als Bakterien. Mit nur 0,015–0,44 µm kann man sie nicht einmal in einem Lichtmikroskop, sondern nur im Elektronenmikroskop sehen. Viren sind keine Zellen, sondern nur Eiweißkapseln mit Erbinformation (33.1). Daher sind sie nicht lebensfähig und können sich auch nicht vermehren, ohne eine Wirtszelle zu befallen. Sie müssen die Wirtszelle dazu bringen, neue Viren zu produzieren.

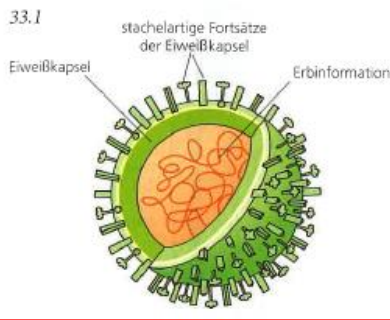

Befindet man sich im selben Raum mit einer erkrankten Person, nimmt man über die Atemluft auch Viren auf (33.2). Die meisten davon werden jedoch – wie die Bakterien – bereits in den Schleimhäuten der oberen Atemwege am Eindringen gehindert.

33.2

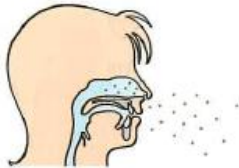

Ist das Immunsystem aber geschwächt, können sich zum Beispiel Schnupfenviren an der Nasenschleimhaut festsetzen und durch die Zellmembran der Schleimhautzellen eindringen (33.3).

33.3

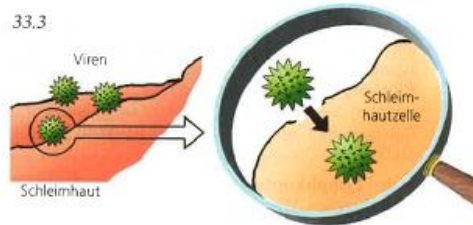

Ist das Virus in die Zelle eingedrungen, zerfällt seine Hülle, sein Erbgut wird freigesetzt und in das Erbgut der Wirtszelle eingebaut. Nun wird die Zelle „gezwungen“, das Erbgut der Viren zu vermehren und noch mehr Viren herzustellen. Dabei geht die Wirtszelle zugrunde. Sie platzt und setzt die neuen Viren frei, die nun weitere Zellen befallen können (33.4).

33.4

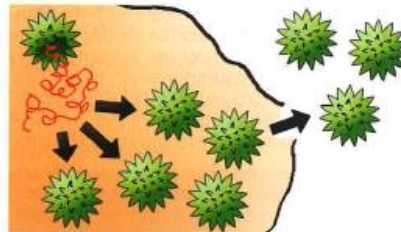

Durch die starke Vermehrung der Viren und die Zerstörung der Wirtszellen entzündet sich die Schleimhaut und schwillt an. Es wird sehr viel Schleim produziert – man hat einen Schnupfen.

## Arbeitsauftrag 2

Zeigt, dass ihr den Unterschied zwischen Bakterien und Viren versteht. Ordnet in der Tabelle unten die Aussagen den richtigen Kategorien zu, indem ihr die Kreise vor den Aussagen entsprechend bemalt oder die Buchstaben einträgt.

**A** gilt nur für Bakterien    **B** gilt für Viren    **C** gilt für Bakterien und Viren

- ☐ 1. Wir können sie mit der Atemluft aufnehmen.
- ☐ 2. Nur wenige davon sind Krankheitserreger.
- ☐ 3. Ein starkes Immunsystem kann sie meist schon abwehren, bevor es zur Infektion kommt.
- ☐ 4. Entzündungen entstehen, wenn die Krankheitserreger Stoffwechselprodukte abgeben.
- ☐ 5. Sie sind Einzeller.
- ☐ 6. Sie zwingen die Wirtszelle, neue Krankheitserreger zu produzieren.

Figure S18. biologie aktiv 4 neu (Rogl & Bergmann, 2017).



stattfinden. Schwann und Schleiden erkannten als Erste, dass die Zelle trotz der Vielfalt in Größe und Gestalt der gemeinsame Baustein aller Tiere und Pflanzen ist. Diese Erkenntnisse wurden durch Untersuchungen von Rudolf Virchow erweitert, der 1855 feststellte, dass jede Zelle aus einer Zelle entsteht (S. 27).

## 1.2 Die mikroskopische Dimension der Zelle

Die meisten Zellen besitzen eine Länge bzw. einen Durchmesser von 1 bis 100  $\mu\text{m}$  (Abb. 17.1). Deshalb können sie mit freiem Auge gar nicht oder nur als Punkte wahrgenommen werden. Das ist auf die Leistungsfähigkeit des menschlichen Auges zurückzuführen. Sie wird durch Eigenschaften der Augenlinse und durch die Anzahl der Lichtsinneszellen der Netzhaut bestimmt. Mit freiem Auge und bei normaler Leseentfernung lassen sich zwei Punkte nur dann voneinander unterscheiden (auflösen), wenn ihr Abstand mehr als 0,1 mm (=100  $\mu\text{m}$ ) beträgt. Diesen Wert bezeichnet man als das **Auflösungsvermögen** des Auges. Durch die Entwicklung von Licht- und Elektronenmikroskopen, die ein weit höheres Auflösungsvermögen besitzen als das menschliche Auge (Abb. 17.1), konnten Zellen genauer erforscht werden. Man erkannte, dass es zwei grundlegende Zelltypen gibt: Eucyten, Zellen mit echtem Zellkern und zahlreichen Zellorganellen, und Procyten, Zellen ohne Zellkern (S. 31). Auch die Feinstruktur der Zellen konnte mithilfe von Mikroskopen aufgeklärt werden.

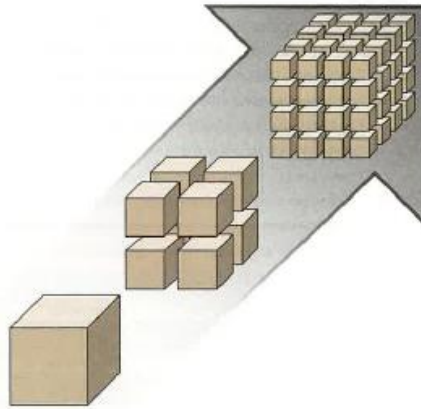

Abb. 17.2: Würfel als Modell für das Oberflächen-Volumen-Verhältnis. Die Halbierung des Kantenmaßes bewirkt eine Verdopplung der Oberfläche bei gleichbleibendem Volumen.

Warum sind Zellen so klein? Viele lebenswichtige Vorgänge finden in der äußersten Schicht der Zelle, der Zellmembran, statt. Um lebensfähig zu sein, ist es für die Zelle wichtig, dass ihre Oberfläche im Verhältnis zum Volumen groß ist. Es ist für Organismen daher vorteilhaft, wenn sie aus vielen kleinen und nicht aus wenigen großen Zellen aufgebaut sind (Abb. 17.2). Ein größeres Tier besteht darum nicht aus größeren Zellen, sondern aus viel mehr Zellen.

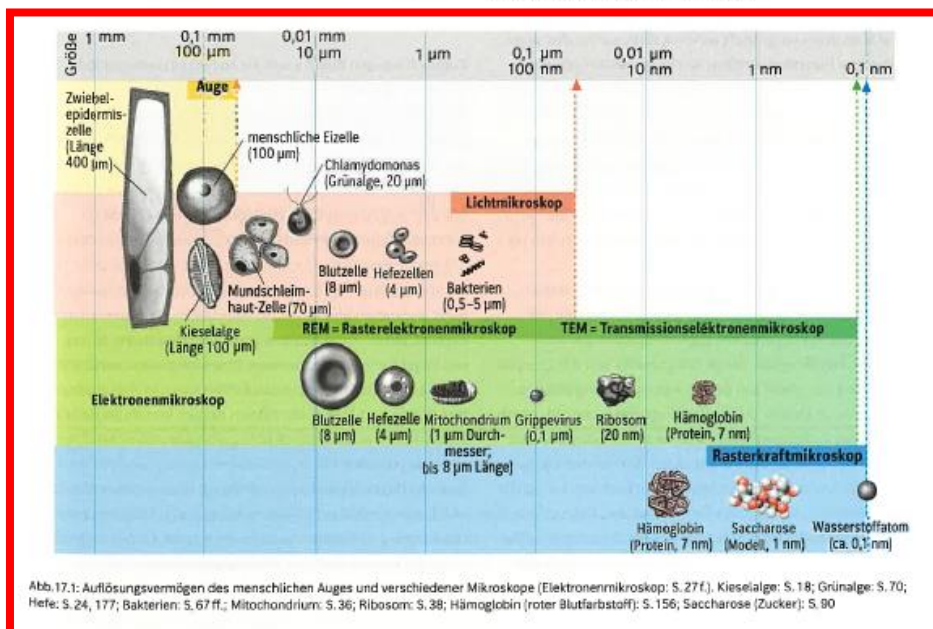

Figure S19. Linder Biologie 5 (Mayer et al., 2016).



### **C 2.1.3 Are explanatory labels present?**

**→ If not, which ones are missing?**

A caption and/or labelling must be present below/in the figure to make it clear what is being depicted.

**Example of "Yes" 1 (see Figure S22):** The caption gives a general explanation, within the figure visible details are labelled.

**Example of "Yes" 2 (see Figure S20).**

**Example of "No" (see Figure S23):** An unlabelled electron micrograph of bacteriophages is shown in the chapter "Immune system".

#### **C 2.1.3.1 Are labels scientifically and technically correct?**

**→ If not, which ones are not?**

If mistakes are found in the labelling or caption, they are listed here.

**Example of "No" (see Figure S24):** The caption in the figure is considered incorrect because the lines do not connect the terms to the respective structures shown.



## GENETIK

13

1952: A. Hershey und M. Chase:

„Virale DNA kann Zellen programmieren – die DNA ist das genetische Material.“

Zur damaligen Zeit war bekannt, dass Phagen, die mit Bakterien in Kontakt kommen, diese auf Virusproduktion umstellen können (Abb. 27.1). Die Hülle von Phagen besteht aus Proteinen, das Innere aus DNA – also genau jene Substanzen, die als genetisches Material infrage kamen. A. Hershey und M. Chase markierten die DNA mit radioaktivem Phosphor, die Proteinmoleküle mit radioaktivem Schwefel und brachten sie mit

Bakterien in Kontakt (Abb. 27.2). Nach der Trennung von Phagen und Bakterien fanden die Forscherin und der Forscher die Hülle außerhalb, die DNA dagegen innerhalb der Bakterien. Sie schlossen daraus, dass nur die DNA des Virus in die Wirtszelle eindringt. Diese DNA-Moleküle bringen die Zelle dazu, neue, intakte Viren zu produzieren. Also kann nur die DNA das genetische Material sein.

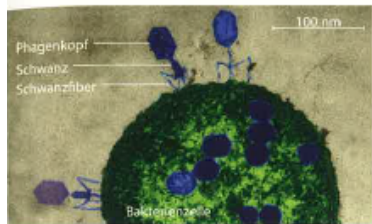

27.1 Phagen binden mit ihren Schwanzteilen an die Wirtszelle, um ihr genetisches Material zu injizieren (elektronenmikroskopische Aufnahme).

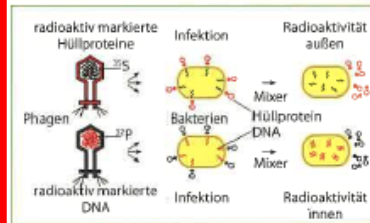

27.2 Die radioaktiv markierte Substanz ist jeweils rot gezeichnet. Die DNA dringt in die Wirtszelle ein. Das genetische Material besteht aus DNA und nicht aus Proteinen.

Hershey, Alfred =  
amerikan. Biologe  
(1908–1997)

Chase, Martha =  
amerikan. Biologin  
(1927–2003)

Phagen =  
Bakteriophagen =  
Viren, die auf den Befehl  
von Bakterienzellen  
spezialisiert sind  
phagein (griech.) =  
fressen

14

### BIO-CHECK-BOX

#### Auf der Suche nach dem Erbmateriale

Lesen Sie Kapitel 1 bis 13 und lösen Sie das Quiz!

- Name für jene Theorie, die T. Boveri und W. S. Sutton 1903 für die Vorgänge der Vererbung entwickelten.
- Fachbezeichnung für die Tatsache, dass Gene gemeinsam vererbt werden können.
- Deutsche Bezeichnung für das Tier Drosophila.
- Nachname des Forschers, der unter anderem das erste Mal nachweisen konnte, dass Gene auf Chromosomen lokalisiert sind.
- Fachbegriff für den Vorgang der Erbänderung, wodurch es – z. B. bei Drosophila – zur Abweichung vom Wildtyp kommt.
- Fachbegriff für die Übertragung der genetischen Information von einer Zelle auf die andere, wie sie von F. Griffith nachgewiesen werden konnte.

Lösungswort: 1 2 3 4 5 6 G A S T E R

Artbezeichnung für eine bestimmte Drosophila-Fliege, die als „Haustier der Genetiker“ gilt

### KURZ- KNAPP

#### VOM CHROMOSOM ZUR DNA

Sie können beschreiben, erklären, darstellen ...

- wichtige Naturwissenschaftlerinnen und Naturwissenschaftler und ihre Beiträge zur Erforschung des Erbmateriale

Sie können untersuchen, interpretieren, dokumentieren ...

- Erbgänge und die Bedeutung des Crossing-over (Genetkopplung)
- exemplarische Experimente und ihre Aussagekraft hinsichtlich wichtiger Erkenntnisse der Molekularbiologie
- Beweise, dass die DNA die Erbsubstanz bildet

Links unter <https://bio-schools.veritas.at>

Figure S20. bio@school 8 (Schermaier & Weisl, 2016).



■ Unser Körper verfügt über **Schutzeinrichtungen** gegen mögliche Krankheitserreger. **Unspezifische Abwehrmechanismen** bilden die erste Schranke gegen Infektionen. Eindringende Keime werden von bestimmten Typen von **weißen Blutkörperchen** (Leukozyten) abgewehrt.

■ **Entzündungsreaktionen** helfen, Infektionen zu bekämpfen. Dabei werden Signalstoffe (**Cytokine**, **Histamine**, **Prostaglandin**) freigesetzt, die den Blutfluss in den Kapillaren und deren Durchlässigkeit sowie das **Schmerzempfinden** erhöhen. Zudem sind sie an der Auslösung von **Fieber** beteiligt.

■ Bei der **spezifischen (erworbenen) Abwehr** werden gezielt Erreger bekämpft. Die Immunreaktion erfolgt in drei Schritten (**Erkennungsphase**, **Differenzierungsphase** und **Reaktionsphase**). Durch die Bildung von **Gedächtniszellen** nach einem Erstkontakt mit einem Erreger wird ein Organismus immunisiert – er ist nun **immun** gegen den bestimmten Krankheitserreger.

■ Immunität kann auch durch das Einimpfen inaktiver, abgetöteter oder abgeschwächter Krankheitserreger (**aktive Immunisierung**) erlangt werden (künstlich erworbene Immunität, **Schutzimpfung**). Durch die Übertragung von Antikörpern (**passive Immunisierung**, **Heilimpfung**) wird eine rasche Bekämpfung von Krankheitserregern bewirkt. Aufgrund fehlender Gedächtniszellen bietet die Heilimpfung jedoch keinen dauerhaften Schutz.

■ **Grippe** oder auch **Influenza** wird durch Viren verursacht, die Ansteckung erfolgt durch **Tröpfcheninfektion**. Es ist möglich, sich mittels **Gripeschutzimpfung** immunisieren zu lassen. Dadurch wird die Chance des Erregers, sich weiterzuverbreiten, minimiert, **Epidemien** oder gar **Pandemien** können unter Umständen so verhindert werden.

■ **AIDS** ist eine folgenschwere **Erkrankung des Immunsystems**, die durch **HIV** hervorgerufen wird. Die Viren zerstören die **T-Lymphozyten** und die **Makrophagen**, wodurch das Abwehrsystem so stark geschwächt wird, dass die Betroffenen anderen Krankheitserregern, auch solchen, die sich bei einem normal funktionierenden Immunsystem nicht vermehren können, mehr oder weniger ausgeliefert sind.

**HIV-positive Menschen** haben die Antikörper gegen das Virus in ihrem Blut (durch Tests nachweisbar). Sie sind nicht krank, ihr Immunsystem ist noch intakt. Die **Inkubationszeit** kann Monate bis Jahre dauern.

**AIDS-krank** sind HIV-positive Menschen, deren Immunsystem bereits gestört ist. Symptome können u.a. unerklärliches Fieber über 38 °C, länger andauernde Lymphknotenschwellungen, grundloser Gewichtsverlust, Durchfall, Magen- und Darmstörungen, Nachtschweiß und sonderbare Hautveränderungen sein.

■ **Fehlfunktionen** des Immunsystems verursachen **Krankheiten**. Bei **Allergien** reagiert der Körper überempfindlich auf **Allergene**. Die schlimmste Form einer allergischen Reaktion ist der **anaphylaktische Schock**. Bei **Autoimmunkrankheiten** richtet sich die Immunabwehr gegen körpereigene Strukturen.

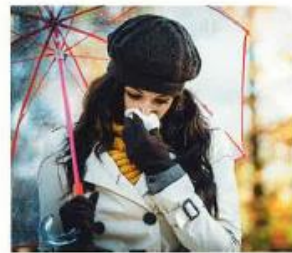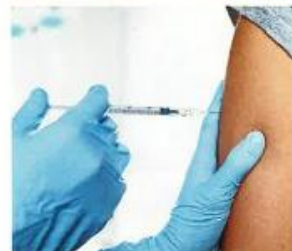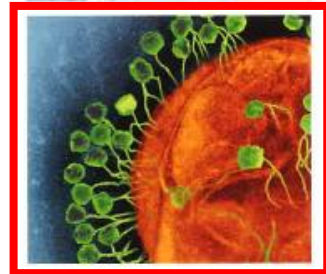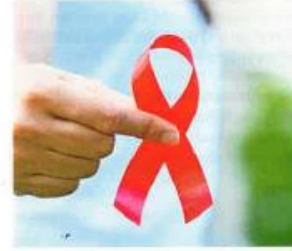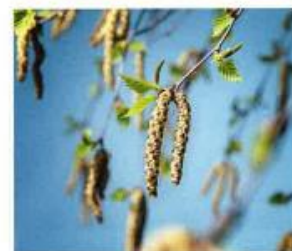

Figure S21. Begegnungen mit der Natur 6 (Biegl, 2018).



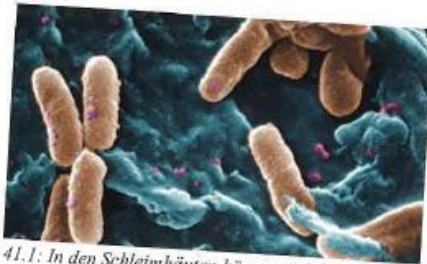

41.1: In den Schleimhäuten können sich Bakterien und Viren einnisten.

### Viren

Viren sind so klein, dass man sie nicht einmal mit dem Lichtmikroskop sehen kann. Sie sind keine eigenständigen Lebewesen, sondern nur kleine Hüllen mit Erbinformation. Deshalb hilft gegen sie auch kein Antibiotikum. Außerhalb einer Wirtszelle können sich Viren nicht vermehren.

Sie heften sich an eine Zelle und geben ihre Erbinformation an diese ab. So zwingen sie die Wirtszelle dazu, in ihrem Kern neue Viren zu produzieren. Die Zelle wird dabei zerstört. Dann platzt die Wirtszelle auf und die Viren treten aus. Sie befallen weitere Zellen. Beim Husten oder Niesen gelangen sie in die Atemluft. Befindet man sich in der Nähe, besteht die Gefahr, dass man diese Viren einatmet (Tröpfcheninfektion).

Die meisten Viren werden bereits in den Schleimhäuten vom Immunsystem erkannt und beseitigt. Wenn aber unser Immunsystem geschwächt ist, können sich zum Beispiel Schnupfenviren an der Nasenschleimhaut festsetzen. Die Nasenschleimhaut wird beschädigt. Sie schwillt an und produziert sehr viel Schleim. Ein Schnupfen entsteht.

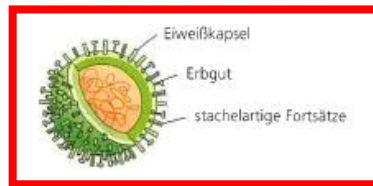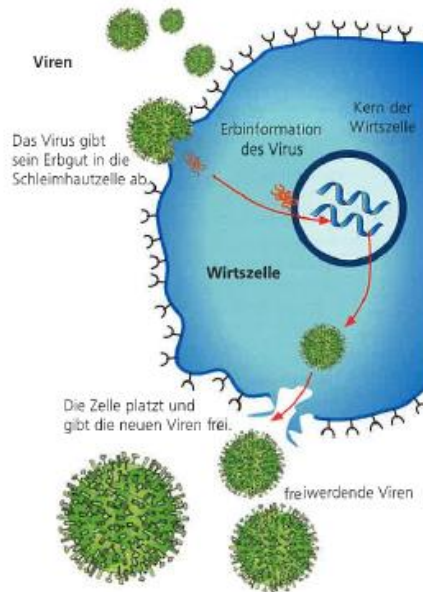

41.2: Wie sich Viren vermehren

4 Finde die Unterschiede und die Gemeinsamkeiten von Bakterien und Viren. Male die Kästchen in den entsprechenden Farben an.

- gilt nur für Bakterien
- gilt nur für Viren
- gilt für Bakterien und Viren

Sie können sich nicht selbständig vermehren.

Sie zwingen die Wirtszelle, neue Krankheitserreger zu produzieren.

Sie sind zu klein, um im Lichtmikroskop sichtbar zu sein.

Sie sind mit Antibiotika behandelbar.

Sie geben Stoffe ab, die Entzündungen hervorrufen.

Ein starkes Immunsystem kann sie meist schon abwehren, bevor es zur Infektion kommt.

Nur wenige davon sind Krankheitserreger.

Sie sind einzellige Lebewesen.

Sie sind mit dem Lichtmikroskop sichtbar.

Sie können durch Atemluft oder Nahrung aufgenommen werden.



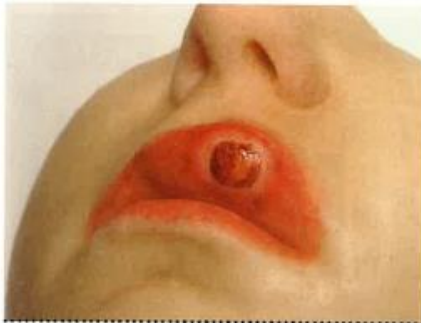

2 Zweites Stadium der Syphilis

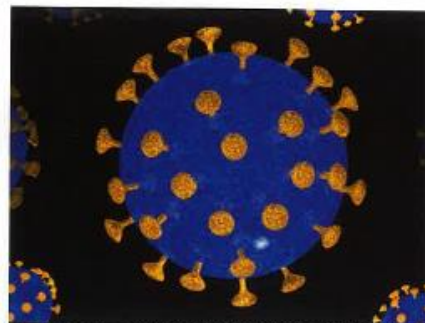

3 HI-Virus

### Gonorrhö oder Tripper

Die weltweit häufigste Geschlechtskrankheit ist die Gonorrhö, auch Tripper genannt. Sie wird durch Bakterien hervorgerufen. Etwa zwei bis fünf Tage nach der Ansteckung verspüren die Betroffenen ein Prickeln und Jucken in der Harnröhre, dann ein Stechen und Brennen beim Wasserlassen. Schließlich tritt eine eitrige Flüssigkeit aus der Harnsamenröhre oder aus der Scheide aus. Spätestens dann muss die Krankheit mit Antibiotika ärztlich behandelt werden. Unbehandelt breiten sich die Bakterien auf die inneren Geschlechtsorgane aus. Bei Frauen und Männern kann sie zu Unfruchtbarkeit führen.

### Pilzkrankungen

Ein Scheidenpilz verursacht starken Juckreiz und einen hellen Ausfluss, manchmal auch ein Brennen beim Wasserlassen. Die Schamlippen sind geschwollen und gerötet. Wird die Infektion nicht behandelt, kann die Frau unfruchtbar werden.

### Herpes genitalis

Drei bis neun Tage nach der Infektion mit den Herpes-genitalis-Viren treten erste Beschwerden auf. Es bilden sich Bläschen, die brennende Schmerzen an den Geschlechtsteilen, manchmal auch am After verursachen. Die Bläschen werden zu Geschwüren, die nach zwei bis drei Wochen abheilen. Das Virus bleibt lebenslang im Körper und kann jederzeit zu Beschwerden führen.

### Aids

Aids ist die Abkürzung für die englische Krankheitsbezeichnung „Acquired Immune Deficiency Syndrome“ und bedeutet auf Deutsch „Erworbene Immunschwäche“. Diese Krankheit ist seit 1981 bekannt und wird durch ein Virus hervorgerufen. Dieses Virus heißt Humanes Immunschwäche-Virus, abgekürzt HIV.

1

Erstelle für Syphilis und Gonorrhö ein gemeinsames Balkendiagramm, das den zahlenmäßigen Unterschied der beiden Erkrankungsfälle in Österreich von 2000 bis 2012 zeigt. Seite 76 mit Abbildung 1 hilft dir dabei.

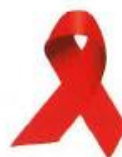

4 Die rote Schleife (Red Ribbon) ist das weltweite Symbol für die Solidarität (Verbundenheit) mit HIV-Infizierten und Aidskranken.



### **C 2.1.3.2 Is the labelling complete/comprehensive?**

**→ If not, which illustrations are incompletely labelled?**

Here, it is listed, for which illustrations labelling is incomplete.

**Example of "Yes" (see figures S22 and S24).**

**Example of "No" 1 (see Figure S25):** One can see surface structures, but these remain unlabelled. On the other hand, labelling of the viral genome is considered unnecessary, since it is not visible in this figure.

**Example of "No" 2 (see Figure S26):** In this figure, three individual viruses are shown: HI virus (A), influenza virus (B) and bacteriophage (C). In the case of the HI virus, capsid and RNA are shown, but only labelled as the "core region". For the influenza virus, none of the drawn structures are labelled. Thus, (A) and (B) are counted as incompletely labelled.

### **C 2.2 Are illustrations of virus replication shown?**

**→ If yes, for which viruses?**

**→ If the replication of a virus is explained graphically, this is listed here.**

**Example of "Yes" (see Figure S27).**

#### **C 2.2.1 Are illustrations scientifically and technically correct?**

**→ If not, which ones are not?**

If mistakes are found in a figure displaying replication, they are to be listed here. Simplifications to achieve generality are not counted. However, if a figure is labelled as showing a replication of a specific virus, it is checked whether this representation is correct for this specific virus.



## Example of "Yes" (see Figure 27): The replication of an influenza virus is

### Viren werden in ihrer Wirtszelle vermehrt

Viren nutzen für ihre Vermehrung die molekularen Vervielfältigungsprozesse im Kern und/oder im Zytoplasma der von ihnen befallenen Wirtszellen

Viren sind intrazelluläre Parasiten. Folglich müssen sie für ihre Vermehrung **in ihre Wirtszelle eindringen** (→ Abb. 11, 12). Das geschieht bei allen Viren mit folgendem Ablauf:

- 1) Anheften an die Wirtszelle
- 2) Eindringen in die Wirtszelle (Endozytose) und Freilegen des viralen Erbguts oder Injektion des Erbguts in die Wirtszelle
- 3) Synthese regulatorischer Proteine (für die Vermehrung des viralen Erbguts)
- 4) Synthese viraler DNA oder RNA mit Hilfe von Wirtsenzymen
- 5) Synthese von Strukturproteinen (für die Herstellung des Capsids) mit Hilfe von Wirtsenzymen
- 6) Zusammensetzung der neuen Viruspartikel
- 7) Freisetzen der neuen Partikel aus der Wirtszelle.

Je nach Virus gibt es dabei aber gravierende Unterschiede: **Viren mit DNA** als Erbgut nutzen bestimmte Enzyme **im Zellkern** ihrer Wirte für die Vermehrung (Replikation) der viralen DNA. Einzig bei Pockenviren, die eigene Replikationsenzyme besitzen, wird die DNA im Zytoplasma der Wirtszellen vermehrt.

**Viren mit RNA** als Erbgut werden überwiegend **im Zytoplasma** ihrer Wirtszellen synthetisiert. Doch auch hier gibt es Ausnahmen: Influenza-(Grippe)-Viren lassen sich im Zellkern ihrer Wirtszellen die neuen Viruskopien mit Hilfe bestimmter Enzyme zurechtschneiden.

Dann gibt es noch Retroviren (Kurzform für Reverse Transkriptase Onkoviren). Der Name kommt von einem Enzym, der Reversen Transkriptase, welches das RNA-Erbgut des Virus in DNA umschreibt (→ S. 37). Manche von ihnen erzeugen Krebs (griech. „onkos“ = Anschwellung). Zu ihnen gehört HIV. Diese DNA wird dann in die DNA der Wirtszelle eingebaut und bringt sie dazu, neue virale RNA herzustellen. So entstehen letztlich wieder RNA-Viren (siehe Abb. 17, S. 37).

Virales Erbgut, das in die DNA der Wirtszelle eingebaut wurde, wird auch bei deren Teilung vermehrt, sofern die Zelle nicht durch die Freisetzung von Viruspartikeln stirbt. Manche Viren stimulieren die Zellteilung und können dadurch **Krebs** verursachen, beispielsweise einige Typen des Humanen Papilloma Virus (HPV).

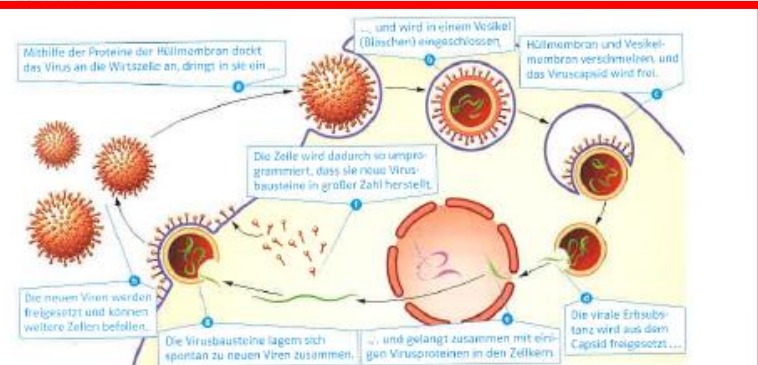

Abb.11: Vermehrungszyklus eines Grippevirus. Grippeviren beinhalten je nach Typ sieben oder acht einzelne RNA-Moleküle. Ihre RNA wird im Zellkern der Wirtszelle vermehrt, aber nicht in das Erbgut der Wirtszelle eingebaut.

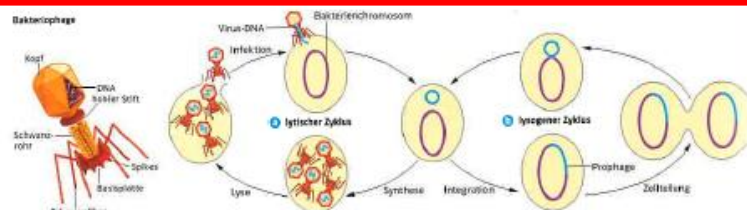

Abb.12: Vermehrungszyklus von Bakteriophagen (DNA-Viren, die Bakterien befallen). Bakteriophagen heften sich mithilfe von Spikes und Schwanzfächer an die Wirtszelle an und injizieren ihre DNA. In der Wirtszelle werden neue Bakteriophagen gebildet. Beim lytischen Zyklus (a) wird die Zelle zerstört, beim lysogenen (b) bleibt sie erhalten.



shown correctly. The text points out that there are several RNA molecules in the capsid. Nevertheless, drawing only one to keep the graph clear is considered an acceptable simplification.

**Example of "No" 1 (see Figure S28):** The figure is labelled "Replication of an influenza virus". Both host cell nucleus and viral genes are shown, but it looks as if the replication of the viral components takes place solely in the plasma of the host cell.

**Example of "No" 2 (see Figure S29):** The image is labelled "Simplified replication cycle of a virus", but not all viruses are DNA viruses.

### **C 2.2.2 Are illustrations showing viral replication complete/comprehensive?**

#### **→ If not, which ones are not?**

If one or more steps of replication are missing, this is noted here. Simplification to achieve generality does not count as incompleteness. For different viruses differ, for example, in the way they enter the cell and in whether or not genetic information is introduced into the nucleus of the host cell. These steps can therefore be shown schematically, e.g., with arrows.

**Example of "Yes" (see Figure S27):** All steps of replication are shown.

**Example of "No" (see Figure S30):** In this figure, the synthesis of new virus components as well as the assembly of the virus particles is not shown. Viruses themselves are drawn only schematically and incompletely; the genetic information of the virus is drawn only once as a ball of thread and remains unlabelled. The drawing is very schematic, the structures shown are not even close to scale.



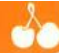

## 6.4 Viren und Viren-Erkrankungen

### Impfen hilft!

#### A) Aktive Immunisierung

Hat man als Kind Masern oder Röteln (vgl. S. 59) überstanden, bleibt man dagegen **immun**, d. h., man kann diese Krankheiten nicht mehr bekommen. Eine Impfung im frühesten Alter kann die Immunisierung gegen diese **Kinderkrankheiten** aber auch **künstlich** herbeiführen. Dabei werden abgetötete oder abgeschwächte Erreger geimpft, die den Körper immunisieren. Bei häufig vorkommenden Erregern (z. B. Masernviren) wird das Immunsystem durch den häufigen Kontakt immer wieder aufgefrischt. Bei selteneren Erregern (z. B. FSME-Viren, welche die „Zeckenkrankheit“ auslösen) kann das Immungedächtnis „vergesslich“ werden. Daher benötigen wir in gewissen Zeitabständen **Aufrischungsimpfungen**.

#### B) Passive Immunisierung

Wird das körpereigene Immunsystem mit einem gefährlichen Erreger nicht fertig, müssen Antikörper direkt zugeführt werden.

1. Erkläre den Unterschied zwischen aktiver und passiver Immunisierung.

2. Kontrolliere in deinem Impfpass, gegen welche Krankheiten du geschützt bist und welche Aufrischungsimpfungen du brauchst.

### Was sind Viren?

Es gibt eine Vielzahl verschiedener Viren mit starken Unterschieden im Aufbau und in der äußeren Form. Manche befallen Bakterien, andere Pflanzen, Tiere oder Menschen und rufen Krankheiten hervor. Allen Viren ist gemeinsam, dass sie **keinen eigenen Stoffwechsel** besitzen. Außerdem zeigen sie **kein Wachstum** und **keine eigenständige Bewegung**.

### Wie vermehren sich Viren?

Zur Fortpflanzung sind Viren auf lebende Zellen angewiesen. Dazu nehmen sie zuerst Kontakt mit der Wirtszelle auf und dringen dann in das Zellinnere ein. Nach kurzer Zeit veranlassen sie die Wirtszelle, ihren Stoffwechsel ganz auf die Produktion von Virusbestandteilen umzustellen. Diese setzen sich dann zu vollständigen Viren zusammen und bringen die Zelle zum Platzen. Freigesetzt können sie neue Zellen befallen.

3. Manche Forscher und Forscherinnen sagen, Viren seien keine Lebewesen. Überprüfe diese Meinung anhand der Kennzeichen des Lebens.

### Wie verbreitet sich das Grippevirus?

Das Grippevirus befällt vor allem Schleimhautzellen von Nase und Bronchien und vermehrt sich dort. Durch Husten und Niesen werden virushaltige Flüssigkeitströpfchen in die Umwelt geschleudert. Gelangt ein solches Tröpfchen auf die Schleimhäute einer anderen Person, kann diese angesteckt werden (**Tröpfcheninfektion**). Die Virusinfektion schwächt das Immunsystem, sodass zusätzlich Bakterien in die durch Viren geschädigten Gewebe eindringen können: Diese lösen dann **Sekundärinfektionen** (lat. *secundus* = zweiter) wie Lungen- oder Mittelohrentzündung aus.

4. Wie verhalte ich mich bei Husten- oder Niesreiz richtig, um niemanden anzustecken?

5. Antibiotika setzt man zur Bekämpfung von Krankheiten ein, die durch Bakterien verursacht werden. Warum kann der Einsatz von Antibiotika auch im weiteren Verlauf einer Virusinfektion sinnvoll sein?

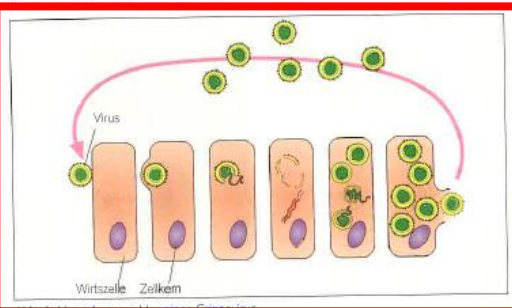

Figure S25. BIOS 4 (Keil et al., 2010).



## EVOLUTION

8

### Viren leben nicht, können sich aber trotzdem vermehren – dabei passiert oft Evolution im Miniformat.

Viren haben im Gegensatz zu Bakterien keinen eigenen Stoffwechsel und es fehlen ihnen die für Wachstum und Teilung notwendigen Bausteine und Enzyme.

für ihre Vermehrung sind sie auf einen Wirtsorganismus angewiesen (Abb. 137.1).

Viren bestehen aus Erbgut (DNA oder RNA) und einer Proteinhülle (vgl. bio@school 5, S. 69). Die Nutzung von Zellstrukturen ermöglicht es Viren, bestimmte Proteine zu produzieren, die einerseits dazu dienen, das Erbmateriale zu vervielfältigen, andererseits zum Aufbau der neu gebildeten Virushüllen verwendet werden.

Nachdem in einer befallenen Wirtszelle neue Viren gebildet wurden, werden diese aus der Zelle geschleust.

Dieser Vermehrungszyklus von Viren wurde übrigens beim bekannten Experiment von Hershey & Chase zum Nachweis der DNA als Erbmaterial genutzt (vgl. S. 27).

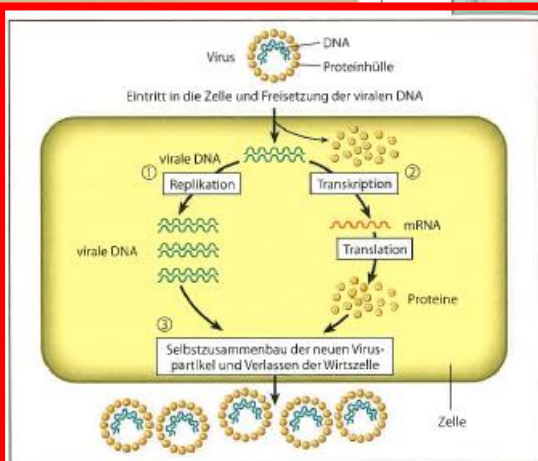

137.1 Vereinfachter Vermehrungszyklus eines Virus

9

### Sichelzellenanämie als Schutz vor Malaria?

Die Sichelzellenanämie ist eine rezessive Erbkrankheit, die durch eine Mutation am Hämoglobin verursacht wird. Durch den Austausch einer Aminosäure verändert sich das Löslichkeitsverhalten des Hämoglobins. Es kristallisiert bei Sauerstoffmangel aus, wodurch sich die roten Blutzellen sichelförmig verformen (vgl. Abb. 46.1).

Aufgrund ihrer Starrheit verstopfen die Sichelzellen die feinen Blutgefäße. Dadurch wird die Sauerstoffversorgung unterbunden und es entstehen weitere Sichelzellen, wodurch es zu schweren Funktionsstörungen des Körpers und zu Organschäden kommt.

Ohne intensive medizinische Betreuung sterben reinerbige Sichelzellen-Erkrankte meist schon in den ersten Lebensjahren.

Obwohl das Sichelzellengenes ganz offensichtlich nachteilige Wirkungen hat, kommt dieses Gen in bestimmten Bevölkerungsgruppen erstaunlich häufig vor. Bei manchen afrikanischen Volksstämmen besetzt das rezessive Allel 20% der Hämoglobin-Genorte – eine sehr hohe Frequenz für ein Allel, das sich bei Homozygoten katastrophal auswirkt.

Man kann beobachten, dass das Sichelzellengenes vor allem in den von Malaria verseuchten Gebieten verstärkt auftritt (Abb. 137.2).

Menschen mit dem veränderten Hämoglobin sind gegenüber dem Malariaerreger resistent. Heterozygote Träger des Sichelzellengenes haben zwar das veränderte Hämoglobin, aber etwa 50% des Blutfarbstoffs wer-

den vom unveränderten Hämoglobin gestellt. Sie sind gesund und ihre roten Blutzellen gehen nur unter extremen Bedingungen, z. B. bei einem Aufenthalt in großen Höhen, in die Sichelform über.

Die roten Blutzellen mit beiden Hämoglobinarten haben eine veränderte Durchlässigkeit der Zellmembran, die zu einem niedrigeren Gehalt an Kaliumionen führt. Der Malariaerreger kann in diesem Milieu aber nicht überleben.

In Malariaegebieten hat also eine natürliche Selektion stattgefunden. Heterozygote haben gegenüber den reinerbigen eine höhere Überlebenschance. Homozygote Betroffene sterben sehr früh, homozygote Gesunde haben keinen besonderen Schutz gegenüber Malaria.

**Malaria** = Sumpffieber, Wechsel-fieber; fieberhafte Infektionskrankheit subtropisch-tropischer Gebiete mit typischen periodischen Fieberanfällen; Erreger sind verschiedene Plasmodienarten  
**malaria (ital.)** = „schlechte Luft“  
**Plasmodien** = Gattung von Einzellern, die im Blut von Menschen schmarotzen und Krankheiten hervorrufen  
**plasma (griech.)** = das Geförmte  
**eides (griech.)** = gestaltet, ähnlich

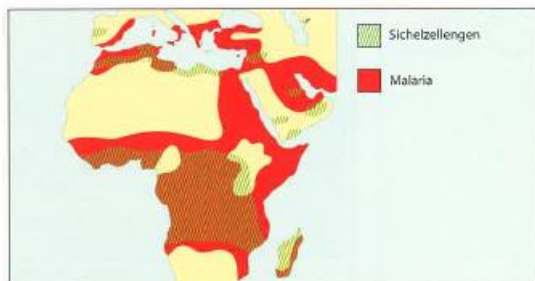

137.2 Verbreitung der Malaria und des Sichelzellengenes in Afrika

Linka unter <http://bio-schoolb-veritas.at>

137

Figure S26. bio@school 8 (Schermaier & Weisl, 2016).



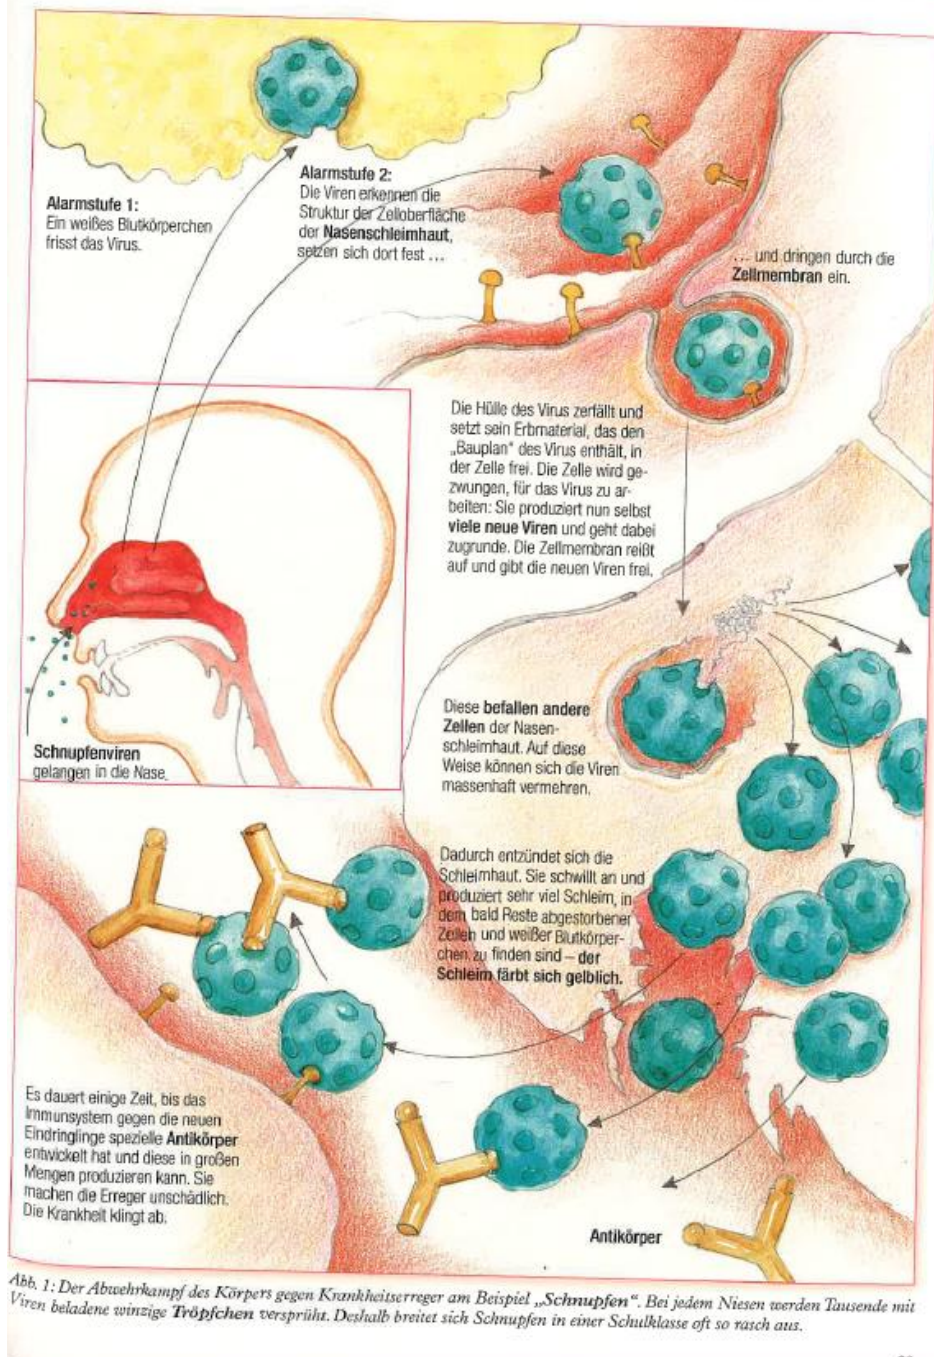

Figure S27. B &amp; U 4 (Schuller &amp; Burgstaller, 2013).



### **C 2.2.3 Is explanatory labelling present?**

#### **→ If not, what is missing?**

A caption or a label in the figure must be present so that it is clear what is being depicted. A numbering of the steps and an explanation in the main text is also possible in order to be able to describe the complex process in detail, since there is not always enough space for this within the illustration. [No negative examples found.]

#### **C 2.2.3.1 Are labels scientifically/technically correct?**

##### **→ If not, which ones are not?**

If mistakes are found in the labelling, they are to be listed here.

**Example of "Yes" (see Figure S27).**

**Example of "No" (see Figure S29):** According to the caption, this is a general representation of replication; since not all viruses are DNA viruses, the corresponding structure would have to be labelled as "genome" or the like.

#### **C 2.2.3.2 Are they complete?**

##### **→ If not, which ones are not?**

Here, a list is to be made of all elements of a figure remaining unlabelled.

**Example of "Yes" (see Figure S31).**

**Example of "No" 1 (see Figure S28):** Viral genome and viral structural proteins are shown but not labelled.



**Example of "No" 2 (see Figure S30):** The genetic information of the virus is drawn once as a ball of thread, but unlabelled.

### **C 2.3 Are there any other scientific graphics about viruses?**

#### **→ If yes, which ones?**

Here, illustrations of scientific relevance are to be listed in which viruses or their components are depicted, but which have not already been mentioned for C 2.1 or C 2.2. A figure is also counted if the structures depicted are not labelled as viruses, but if one can infer, that viruses are related to the figure from the type of depiction or context. Irrelevant graphics are not counted, e.g., purely decorative elements, cartoons or photos without scientific content.

**Example of "Yes" 1 (see Figure S19):** In this figure, somatic gene therapy with viral vectors is depicted.

**Example of "Yes" 2 (see Figure S32):** A map of Austria is shown with colour markings for areas, where TBE-infected ticks have been found.

**Example of "No" 1 (see Figure S33):** The term "AIDS" appears in the caption, but the image of a baboon has no further scientific or educational meaning in this context and remains unexplained.

**Example of "No" 2 (see Figure S34):** The comic shown here does not contain any special information on viruses or viral diseases; only the word "measles" appears in it.



## 1.11 Viren – Piraten der Zelle

### Viren sind keine Lebewesen und nutzen lebende Zellen zur Vermehrung

Viren sind keine Zellen oder Lebewesen, sie bestehen aus Nukleinsäuren mit Proteinhüllen

Du hast sicher schon mindestens einmal in deinem Leben Bekanntschaft mit Viren<sup>1</sup> gemacht: Viren bescheren uns Schnupfen, grippale Infekte, Feuchtblättern (Windpocken) oder Warzen – in schlimmen Fällen auch Influenza, AIDS oder andere schwere Krankheiten.

Viren sind also oft pathogen, und werden daher vielfach in einem Atemzug mit anderen Krankheitserregern wie Bakterien genannt. Tatsächlich sind Viren aber etwas völlig anderes – sie sind nicht einmal Lebewesen!

Was zeichnet Viren nun aus? Viren sind keine Zellen, sondern bestehen nur aus Nukleinsäure (DNA oder RNA) in einer Proteinhülle, dem **Capsid**. Manche sind zusätzlich von einer Membran umgeben. Vermehren können sich Viren nur, wenn ihre Nukleinsäure in eine lebende Zelle gelangt und deren Stoffwechsel nutzen kann (→ Abb. 24).

Viren treten in unterschiedlichen Größen und Formen auf – die meisten sind sehr klein (die kleinsten sind nur 15 nm groß, also kleiner als Ribosomen) und einfach gebaut. Es gibt aber auch besonders auffällige Formen: **Bakteriophagen**<sup>2</sup> (→ Abb. 23 d) etwa sind bis zu 200 nm groß und sehen aus wie Objekte aus einem Science-Fiction-Film. Diese Viren „landen“ wie Mondfähren auf Bakterien und injizieren ihre DNA durch das Schwanzrohr in die Bakterienzelle.

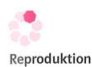

Reproduktion

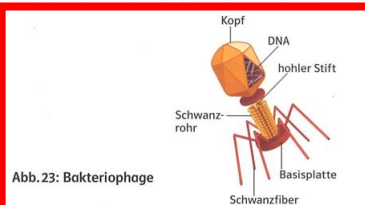

Abb.23: Bakteriophage

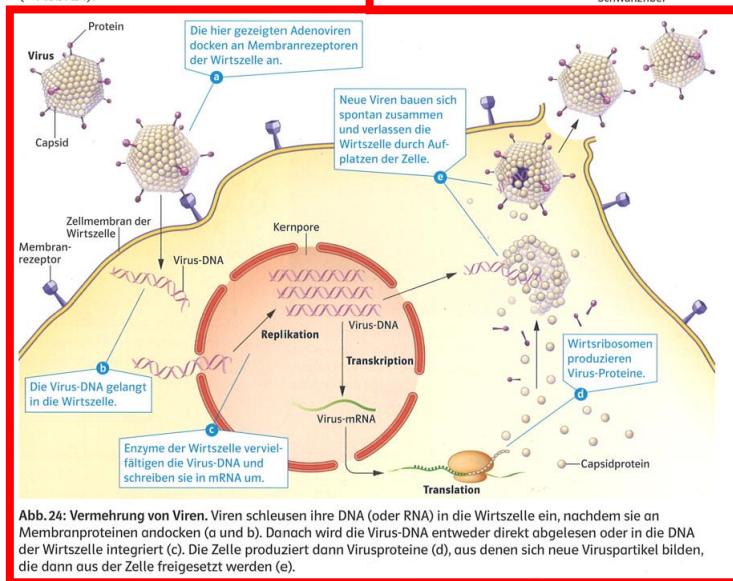

Abb. 24: Vermehrung von Viren. Viren schleusen ihre DNA (oder RNA) in die Wirtszelle ein, nachdem sie an Membranproteinen andocken (a und b). Danach wird die Virus-DNA entweder direkt abgelesen oder in die DNA der Wirtszelle integriert (c). Die Zelle produziert dann Virusproteine (d), aus denen sich neue Viruspartikel bilden, die dann aus der Zelle freigesetzt werden (e).

#### Glossar

<sup>1</sup> Virus, vom Lateinischen Wort für Gift. Ein einzelnes Viruspartikel wird als Virion bezeichnet.  
<sup>2</sup> **Bakteriophagen**, vom Griechischen *bakterion* (Stäbchen) und *phagein* (fressen), sind relativ große Viren mit kompliziertem Aufbau, die Bakterien befallen

#### Aufgabe

**W 1** „Viren sind keine Lebewesen“. Bestätige diese Aussage, indem du die Kennzeichen des Lebens wiederholst und überprüfst, welche davon auf Viren zutreffen.

#### Basiskonzept

**Reproduktion:** Viren nutzen die Vermehrungs-Maschinerie von Wirtszellen. Das zeigt, dass der genetische Code und die genetischen Reproduktionsmechanismen universell sind. Zellen können nicht zwischen eigener und Virus-DNA unterscheiden, beide werden mit den gleichen Enzymen vervielfältigt und abgelesen.



## Du kannst Erkenntnisse gewinnen

- E 1** Schau dir das Experiment auf S. 44 noch einmal an: Entwirf ein weiteres Experiment, bei dem du die Wirkung von Händeschütteln und zwischenzeitlichem Händewaschen mit Wasser, Seife und Desinfektionsmitteln auf Pilze (→ Abb. 39) testest. Verwende dazu Bäckerhefe (in Form einer Suspension) als Testorganismus. Erläutere deine Vorgehensweise, formuliere eine Hypothese und teste sie.

- E 2** Führe das Experiment anschließend mit mehreren Versuchspersonen durch. Protokolliere deine Ergebnisse und stelle dar, ob sich deine Hypothese als richtig oder falsch erwiesen hat. Diskutiere, was die Ursachen für deine Ergebnisse sein könnten.

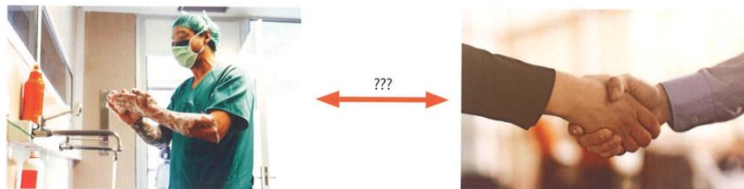

Abb. 39: Handpilzinfektion. Auch auf gesunden Händen leben viele Mikroorganismen. Händeschütteln kann daher zu einer Ansteckung mit Pilzen, Bakterien oder Viren führen.

## Du kannst Standpunkte begründen und reflektiert handeln

- S 1** Schau dir in Abb. 40 die Verbreitung von FSME in Österreich an. Begründe, ob du angesichts dieser Daten eine Impfpflicht hinsichtlich FSME aussprechen würdest. Lege dar, welche Personen besonders gefährdet sein könnten (zB Waldkindergartenkinder) und nenne Gründe für deine Einschätzung. In alpinen Gegenden ist FSME selten, nimmt aber offenbar zu. Recherchiere und erkläre, welche Gründe es dafür geben kann.

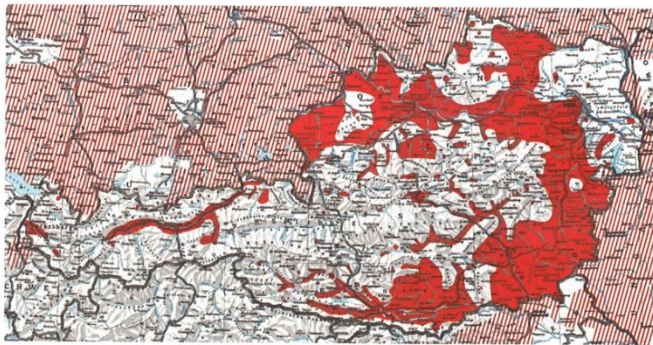

Abb. 40: FSME in Österreich. Rot markiert sind Gegenden, in denen Forschungsteams der Universitäten Graz, Innsbruck und Wien Zecken mit FSME-Viren fanden, die gestrichelten Flächen zeigen die Verbreitung in den Nachbarländern. (Stand: Dezember 2017.)



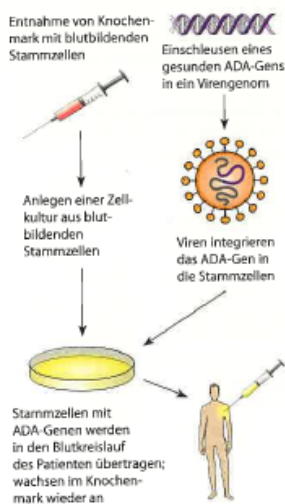

33 Somatische Gentherapie bei ADA-Immunschwäche (Schema)

### Selbst aktiv!

Erläutere, welchen Vorteil das Einschleusen gesunder ADA-Gene in eigene Knochenmarkszellen bei der ADA-Gentherapie bringt.

### Keimbahntherapie

Die Keimbahntherapie wurde bereits im Tierversuch erprobt, die Forschungsergebnisse zeigen jedoch, dass diese Technik noch lange nicht anwendungsreif ist. So wird beispielsweise das therapeutische Erbgut nicht immer in gewünschter Weise aufgenommen und gesunde Gene können dabei zerstört werden. In der Folge müsste also auf jeden Fall eine PID durchgeführt werden, was den Zweck der Keimbahntherapie wiederum in Frage stellt.

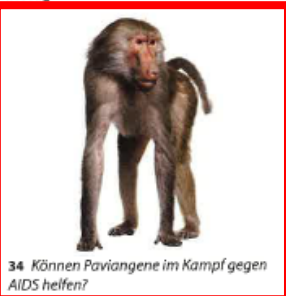

34 Können Paviangene im Kampf gegen AIDS helfen?

### Das Einschleusen von gesunden ADA-Genen war die erste erfolgreich durchgeführte Gentherapie

Die ADA-Immunschwäche beruht auf einem angeborenem Gendefekt, der die Bildung des Enzyms Adenosin-Desaminase (ADA) unterbindet. ADA ist für den Abbau von bestimmten Stoffwechselprodukten zuständig, die den Körper schädigen. Fehlt ADA, reichern sich diese im Körper an und verhindern die Bildung der T-Lymphozyten. ADA-Patientinnen bzw. -Patienten sterben an den harmlosesten Infektionen, wie beispielsweise Schnupfen. Betroffene müssen deshalb von jeglichem Infektionsrisiko ausgeschlossen sein, sie können nur in sterilen Plastikzellen überleben.

Die erste erfolgreiche Gentherapie wurde im Jahr 1990 von amerikanischen Ärzten, an einem vierjährigen Mädchen, das an der ADA-Immunschwäche litt, durchgeführt. Der vierjährigen Patientin wurde Blut entnommen. Im Reagenzglas schleusten die Ärzte mit harmlosen retroviralen Vektoren gesunde ADA-Allele in die weißen Blutkörperchen ein. Durch Infusionen wurden die gentechnisch veränderten Blutzellen wieder in den Körper des Kindes eingebracht. Nach einigen Behandlungen besserte sich der Zustand des Kindes. Da sich reife weiße Blutkörperchen nicht vermehren, musste die Transfusion der gentechnisch veränderten Blutkörperchen periodisch wiederholt werden.

Eine Verbesserung der ADA-Gentherapie ist das Einschleusen der gesunden ADA-Gene in eigene Knochenmarkszellen (siehe Abb. 33).

### Die Keimbahntherapie ist ethisch umstritten

Therapeutische Eingriffe zur gezielten Reparatur von Genen in den Zellen der Keimbahn (Ei- und Samenzellen bzw. ihre Mutterzellen), die **Keimbahntherapie**, werden aus ethischen Gründen abgelehnt und ist auch in den meisten Ländern der Welt verboten. Es stellt sich allerdings die Frage, wie lange das noch so sein wird. Es ist unbestritten, dass die Verhinderung bestimmter Krankheiten, wie beispielsweise Mukoviszidose (siehe Seite 53), nur über die Keimbahn möglich ist. Da die Genkorrekturen in den Keimzellen an die Nachkommen weitergegeben werden, ließen sich Erbkrankheiten, die über Generationen in einer Familie immer wieder auftreten, besiegen.

Eine andere Zielsetzung der Keimbahntherapie wäre das zusätzliche Einbringen neuer Gene in das menschliche Erbgut. Es könnten beispielsweise Gene eingeschleust werden, die eine Immunität gegen bestimmte Infektionskrankheiten bewirken. So wurde bereits darüber spekuliert, ein in Pavianen vorkommendes Gen, das den Tieren eine Abwehr gegen HIV verleiht, auf den Menschen zu übertragen.

Langfristige Folgen eines solchen Eingriffs für die Funktion des menschlichen Erbgutes sind allerdings unabsehbar.

Gegnerinnen und Gegner der Keimbahntherapie argumentieren unter anderem damit, dass diese Methode zur „Verbesserung des menschlichen Erbgutes“, also zur Schaffung eines „genetisch aufgerüsteten Menschen“, eines „Supermenschen“ missbraucht werden könnte.

### Die Gentherapie ist noch nicht ausgereift

Obwohl Gentherapie schon in vielen Fällen erfolgreich durchgeführt werden konnte, gibt es noch einige Hürden zu überwinden, bevor sie routinemäßig eingesetzt werden kann. Zum Beispiel ist es bis heute noch nicht gewährleistet, eine exakte genetische Kontrolle über das transferierte Gen zu erreichen. So passierte es, dass sich in manchen Fällen Gen-Taxis, die zur Behandlung der ADA-Immunschwäche (siehe oben) eingebracht wurden, nicht nur im gewünschten, sondern auch in einem Krebsgen verankerten. Die betroffenen Kinder erkrankten dadurch an Leukämie. Weiters ist noch nicht gewährleistet, dass der Einbau des therapeutischen Gens nicht die Funktion anderer Gene beeinträchtigt.



Nein, heute Nacht war eine Gelse in meinem Zimmer.

Na klar, aber sie ist mir immer entwischt. So hab ich mich immer nur selbst geohrfeigt, weil ich geglaubt hab, sie sitzt auf meiner Wange.

Paul, was hast du denn für Tupfen im Gesicht? Hast du die Masern bekommen?

Hast du sie nicht gejagt?

Na dein Gefühl hat dich nicht getäuscht, so wie die Gelse dich zugerichtet hat.

§ 2.4 Gelsenweibchen – kleine Blutsauger

An schwülen Sommerabenden hindert dich oft ein hoher Summton neben deinem Ohr am Einschlafen. Dieser Ton stammt dann von einer Gelse, die deinen **Schweiß** gerochen hat. Sie möchte dein **Blut** saugen. Es ist ein Weibchen, das dringend Nahrung braucht, um genügend Kraft für die Bildung der Eier zu tanken. Wenn du die Gelse spürst und nach ihr schlägst, ist es meistens schon zu spät, um sie am Stechen zu hindern. Es **juckt** an der Einstichstelle und es entsteht bereits eine harmlose, aber unangenehme **Quaddel** („Gelsendippel“).

Gelsenweibchen besitzen **stechend-saugende Mundwerkzeuge**. Ober- und Unterkiefer sind als spitze **Stechborsten** ausgebildet, und Ober- und Unterlippe weisen die Form einer Röhre bzw. Rinne auf. Durch die **Zunge**, einem Teil der Unterlippe, wird **Speichel** in die Wunde gebracht, der die Gerinnung des Blutes verhindert. Dieser Speichel löst auch den **Juckreiz** und die Bildung der **Quaddel** aus. Durch die Röhre der Oberlippe wird das **Blut** des Opfers aufgesogen und im Hinterleib gespeichert. Die **Gelsenmännchen** ernähren sich nur von **Pflanzensäften**.

Stechmückenweibchen legen ihre etwa **300 Eier** an der Oberfläche stehender Gewässer ab. Die Larven schlüpfen im Wasser und ernähren sich dort von kleinen Algen und Bakterien. Nach etwa 2 bis 3 Wochen verwandeln sich die Larven in bewegliche **Mumpenpuppen**, aus denen sich die Gelsen entwickeln.

**Weitere Zweiflügler**

**Graue Fleischfliege**

**Wichtigste Merkmale:**  
Bis 15 mm lang; dunkel bis hellgrau gestreifte Brust, schwarzweiß gewürfelter Hinterleib; Saugrüssel

**Lebensraum:**  
Überall in Europa und Afrika

**Nahrung:**  
Frischfleisch, Aas

**Pferdebremse**

**Wichtigste Merkmale:**  
Bis 20 mm lang; graubrauner Körper, Hinterleib dunkel quergestreift, bunt schillernde große Netzaugen; Stechrüssel

**Lebensraum:**  
bei Pferde- und Rinderweiden

**Nahrung:**  
Blut, Pflanzensäfte

**Kohlschnake**

**Wichtigste Merkmale:**  
Bis 25 mm lang; schlank, lange Beine, farblose Flügel; können nicht stechen; größter heimischer Zweiflügler

**Lebensraum:**  
Weit verbreitet

**Nahrung:**  
Erwachsene Tiere nehmen keine Nahrung auf

**Klasse:** Insekten  
**Ordnung:** Zweiflügler  
**Familie:** Stechmücken  
**Art:** viele Arten

Die **stechend-saugende Mundwerkzeuge** (z. B. bei Gelsen) bestehen aus Stechborsten und einer Saugröhre.

Bei der **Blutgerinnung** wird flüssiges Blut fest, um die Wunden zu verschließen.

Abb. 61.1: Eine weibliche Gelse saugt Blut

Abb. 61.2: Kopf und Mundwerkzeuge einer Stechmücke

**MERK DIR!** Stechmücken (z. B. Gelsen) zählen zu den Zweiflüglern und besitzen stechend-saugende Mundwerkzeuge. Die Weibchen saugen Blut, das sie für die Bildung ihrer Eier benötigen. Die Larven entwickeln sich in stehenden Gewässern.

Abb. 61.3: Gelsenlarven im Wasser

Figure S31 4. BIO Buch 2 neu (Kugler & Auer, 2015)



### **C 2.3.1 Are they scientifically/technically correct?**

#### **→ If not, which ones are not?**

Here, mistakes in one or more scientific figures are listed. Simplifications are not counted, especially if the figure is labelled as schematic.

**Example of "Yes" (see Figure S19).**

**Example of "No" (see Figure S35):** In this illustration of transduction, it looks as if a single phage is moving from bacterium to bacterium, chauffeuring DNA segments. The caption also does not explain that the propagation cycle is omitted here.

### **C 2.3.2 Are these figures complete?**

#### **→ If not, which ones are not?**

Here, it is evaluated whether the scientific graphic shows what it is supposed to show in the respective context. In the case of drawings of complex processes, simplification may aid understanding. However, if essential components are omitted, this earns a "No".

**Example of "Yes" 1 (see Figure S19).**

**Example of "Yes" 2 (see Figure S32).**

**Example of "No" 1 (see Figure S36):** Not all possible ways of infection with HIV are shown.



Bakterienzelle können sie bakterielle DNA-Stücke mitnehmen. Befallen die Phagen ein anderes Bakterium, kann das DNA-Stück in diese neue Bakterienzelle übertragen werden.

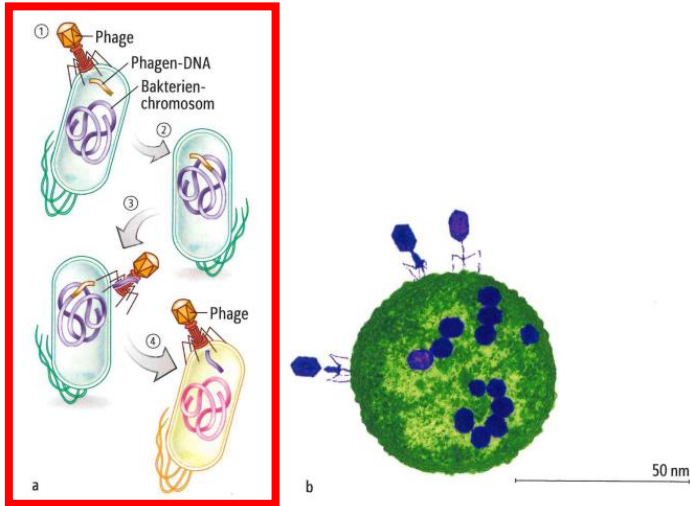

▲ 4. Transduktion. a) Schema vereinfacht: 1. Phage infiziert ein Bakterium mit Phagen-DNA. 2. Phagen-DNA liegt im Bakterium vor. 3. Phage verlässt das Bakterium und nimmt einen DNA-Abschnitt des Bakteriums mit. 4. Dieser DNA-Abschnitt wird bei der nächsten Infektion auf eine neue Bakterienzelle übertragen. b) Elektronenmikroskopische Aufnahme eines Bakteriophagen auf einer Bakterienzelle

 **Viren:** bestehen nicht aus Zellen, sondern sind Partikel mit einer Größe zwischen 20 bis 300 nm. Diese Partikel sind aus einer Proteinhülle (Capsid) aufgebaut, die Nucleinsäuremoleküle in Form von DNA oder RNA umgibt. Viren haben keinen eigenen Stoffwechsel. Dadurch sind sie für die Vermehrung auf andere Zellen angewiesen. Das heißt, sie befallen geeignete Wirtszellen, im Fall der Bakteriophagen Bakterien, und veranlassen diese, neue Viren zu bilden.

## 1.2 Gentechnik am Beispiel der Insulinproduktion

Am Mittagstisch in der Schulkantine erklärt eine Mitschülerin, sie müsse sich vor dem Essen das Hormon **Insulin** injizieren (Abb. 5), da es an **Diabetes Typ 1** leidet (→ Kernbereiche Biologie 5, 6). Doch warum ist das nötig? Durch diese Zuckerkrankheit ist es dem Mädchen nicht mehr möglich, seinen Blutzuckerspiegel durch Regelkreise (→ Kernbereiche Biologie 5, 6) – ein Grundprinzip der Biologie – aufrechtzuerhalten. <sup>4</sup>

 Skizzieren Sie den Regelkreis zur Aufrechterhaltung des Blutzuckerspiegels beim Menschen! Nennen Sie die Funktionen der beteiligten Hormone!

Früher wurde Insulin zur Behandlung von Diabetes Typ 1 aus den Bauchspeicheldrüsen von Tieren gewonnen. Seit Anfang der 90er-Jahre gibt es einfache, gentechnische Produktionsverfahren, mit denen **menschliches Insulin** hergestellt wird. Diese Verfahren haben mehrere Vorteile:

- Sie ermöglichen die Produktion großer Mengen an Insulin.
- Es kommt zu keiner Antikörperbildung und damit auch nicht zu allergischen Reaktionen, wie es bei dem aus Tieren gewonnenen Hormon der Fall sein kann.
- Die Gefahr der Übertragung von Infektionskrankheiten ist sehr gering.
- Die Wirksamkeit ist höher, da menschliches Insulin genau in die Insulinrezeptoren der Zielzellen passt.

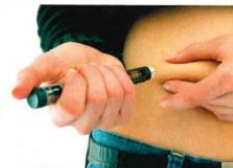

▲ 5. Eine junge Diabetes-Patientin spritzt sich Insulin.



### Was du unbedingt wissen musst

HIV-Positive können bereits unmittelbar nach einer Infektion andere Menschen anstecken. Dazu müssen zwei Voraussetzungen gegeben sein:

- Kontakt mit **Körperflüssigkeiten** von Infizierten, in denen Viren ausreichend vorhanden sind (Blut, Samenflüssigkeit, Scheidenschleim, Muttermilch).
- Eine „**Eintrittspforte**“ muss vorhanden sein, durch die HIV-Viren in die Blutbahn gelangen können. Schon kleinste Wunden genügen.

Daraus ergeben sich als **hauptsächliche Infektionsursachen**:

- ungeschützter Geschlechtsverkehr
- Verwenden von nicht sterilen Injektionsnadeln (z. B. bei Drogenabhängigkeit)
- Blutkontakt bei größeren Verletzungen

### Umgang mit AIDS-Infizierten

Kontakte mit AIDS-infizierten Personen sind im Normalfall nicht ansteckend.

Keine Gefahr besteht also z. B. bei:

- Besuch eines HIV-Positiven (d. h. mit HI-Viren infizierten Menschen)
- Sport mit Infizierten (auch Schwimmen)
- freundschaftlichen körperlichen Kontakten (z. B. flüchtige Küsse, Umarmen, Streicheln)
- Verwendung von Gegenständen eines HIV-Positiven (z. B. Geschirr, Schreibzeug, Kleidung)
- Besuch von Zahnarzt und Friseur, WC-Benützung, Mückenstichen

1 ▶ Überlege, warum Menschen bestimmter Berufsgruppen (z. B. Rettungsleute) im Einsatz immer Gummihandschuhe tragen!

#### Tipp!

Schutz bei Geschlechtsverkehr  
Der einzig wirksame Schutz vor einer Ansteckung durch Geschlechtsverkehr ist die richtige Verwendung eines Kondoms (siehe S. 76).

Genauere Auskünfte erhältst du anonym u. a. bei einer **AIDS-Beratungsstelle** oder der **AIDS-Hilfe**.

2 ▶ AIDS ist heute unheilbar. Warum ist es aber falsch, AIDS-Kranke von der Gemeinschaft zu isolieren? Besprecht, wie ihr mit Infizierten gemeinschaftlich umgehen könnt!

3 ▶ Besprecht, von welchen falschen Vorstellungen über Kontakte mit AIDS-Infizierten ihr schon gehört habt!

4 ▶ Sammelt Berichte über AIDS aus den Medien (z. B. über Fortschritte in der Behandlung), informiert euch im Internet und stellt ein Plakat mit den Ergebnissen zusammen!

5 ▶ Erkunde, wo du dich noch über AIDS beraten lassen kannst, und notiere!

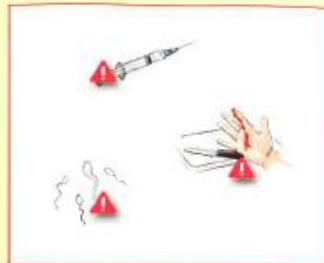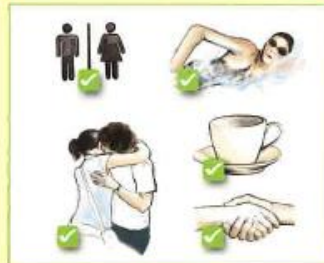

Abb. 1: Nur **bestimmte Kontakte** mit AIDS-Kranken führen zu Ansteckung.

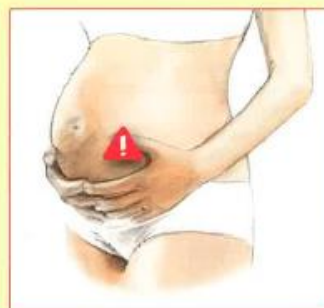

Abb. 2: AIDS – bei **Infizierten** auch eine Gefahr für heranwachsendes Leben

#### AIDS und Schwangerschaft

Eine infizierte Schwangere kann die Krankheit während der Schwangerschaft oder bei der Geburt auf ihr Baby übertragen. Auch eine Übertragung durch Muttermilch kann nicht ausgeschlossen werden.



### Erkrankungen der Atmungsorgane

Du hattest sicher schon einmal Husten, Schnupfen und warst heiser. Das sind Erkrankungen der Atmungsorgane. Krankheitserreger gelangen durch die Atemluft in den Körper. Sie können Entzündungen hervorrufen: Es kommt zu den alltäglichen Erkältungskrankheiten. Bei Fieber muss ein Arzt oder eine Ärztin gerufen werden. Er oder sie merkt an den Atemgeräuschen, ob Luftröhre und Bronchien entzündet sind und du eine Bronchitis hast.

Gefährlich ist eine Lungenentzündung. Bei ihr entzünden sich durch Bakterien oder Viren Teile des Lungengewebes. Hohes Fieber, Kopfschmerzen und starker Hustenreiz sind oft die ersten Anzeichen. Die Lungenentzündung kann durch Medikamente geheilt werden.

Eine heute seltene, aber schwere Infektionskrankheit der Lunge ist die Lungentuberkulose (Tbc). Wird sie rechtzeitig erkannt, kann sie mit Medikamenten behandelt werden.

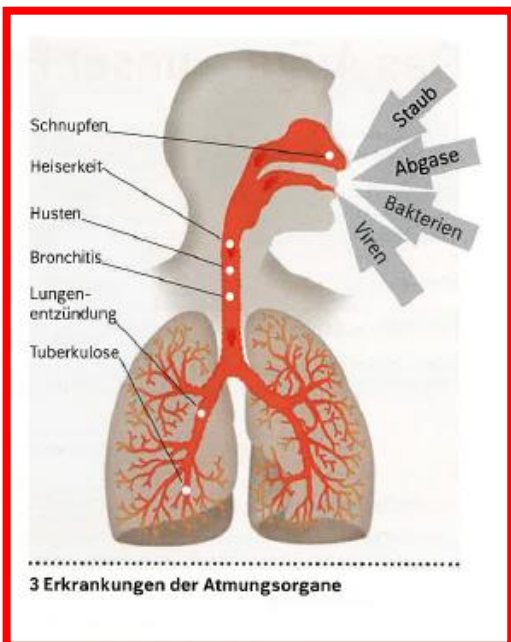

1 Österreicherweit gibt es Messstellen, die die Luftverschmutzung (Feinstaub in der Luft, s. S. 112) messen. Recherchiere im Internet die Begriffe WHO (Weltgesundheitsorganisation), Feinstaub und Grenzwerte für die Feinstaubbelastung.

- Recherchiere,
- welche Folgen die Feinstaubbelastung für unsere Gesundheit und für die von Kleinkindern haben kann,
  - wer für die Reduzierung des Feinstaubes zuständig ist,
  - welche Maßnahmen gesetzt werden können, um die Feinstaubbelastung zu senken,
  - wie du dich vor der Feinstaubbelastung schützen kannst.

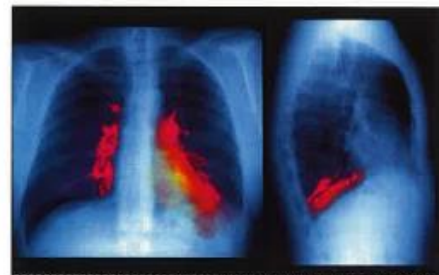

4 Medizinische Aufnahme einer Lungenentzündung

Jetzt weiß ich's !

Eingeatmete, sauerstoffreiche Luft gelangt durch die **Luftröhre** und die **Bronchien** in die beiden **Lungenflügel**. Der **Gasaustausch** (von Sauerstoff und Kohlenstoffdioxid) findet in den **Lungenbläschen** statt. Kohlenstoffdioxidreiche Luft wird ausgeatmet.



# DER MENSCH: Genetik

## Die Gentechnik

### 54. Gentechnik und Lebensmittel

Erforsche!

Amflora – eine Wunderknolle für die Industrie und für die Schule? Lies den Kastentext und beantworte folgende Fragen: Wie siehst du diese Schaffung von Modellschulen, an denen mit gentechnisch veränderten Pflanzen gearbeitet wird? Besprecht die verschiedenen Meinungen in der Klasse.

„Eine gentechnische Veränderung bewirkt, dass in der Kartoffelsorte Amflora nur eine von zwei Stärkesorten gebildet wird. Das ist jene Stärke, die für die Herstellung von Kleber, Baustoff und Papier benötigt wird. Diese gentechnisch veränderte Kartoffelsorte erhielt bereits 1998 eine Anbau-Zulassung in der EU. Angebaut wurde sie aber erst 2010, als gleichzeitig auch die Abfallprodukte als Futtermittel zugelassen wurden. Das ist umstritten, weil dadurch Amflora in den Nahrungskreislauf gelangt und diese Kartoffel ein Antibiotikaresistenzgen enthält.“

Gleichzeitig mit dem Anbaustart entstand ein Modellprojekt, bei dem Schulen mit speziellen Laboren für biotechnologische Experimente ausgestattet wurden. Den Schülerinnen und Schülern soll der Zugang zur Molekularbiologie erleichtert werden. Das Bündnis für gentechnikfreie Landwirtschaft sieht darin eine mögliche Manipulation von Schülerinnen und Schülern, wenn sie nicht neutral informiert werden.“ (Verändert aus: bildung + science Nr. 2/ 2012, Seite 20 ff.)

#### Gentechnisch veränderte Lebensmittel

Gentechnisch veränderte Lebensmittel bestehen aus gentechnisch veränderten (transgenen) Pflanzen, Tieren oder Mikroorganismen (s. Kap. 53). Bei diesen Veränderungen geht es vor allem um Eigenschaften, die eine kostengünstige Produktion von wirtschaftlich bedeutsamen Pflanzen wie Mais, Soja, Raps und Baumwolle (s. Seite 111) ermöglichen. Dazu gehört die **Herbizidresistenz**. Resistenz ist die Widerstandsfähigkeit eines Organismus gegenüber äußere Einwirkungen. Herbizide sind „Unkrautvernichtungsmittel“. Gentechnisch so veränderte Pflanzen überstehen die Anwendung eines Herbizids. Eine andere gewünschte Eigenschaft ist zum Beispiel, dass Pflanzen ein spezielles **Insektizid**, ein Gift gegen Fraßschädlinge, erzeugen. Gentechnisch veränderte Maispflanzen können das gegen den Maiszünsler. Fressen Maiszünsler diese Pflanzen, gehen sie zugrunde. Ähnliches gilt für **virus- und pilzresistente** Pflanzen. Zuckerrüben können durch das Rhizomania-Virus befallen werden ❶. Durch Gentechnik resistent gemachte Pflanzen werden davon nicht befallen.

Aber auch Eigenschaften, die die **Vermarktung** betreffen, können gentechnisch manipuliert werden. Bekannt ist die „Anti-Matsch-Tomate“. Bei ihr wird das Gen für die Bildung des Reifeenzym blockiert. Dadurch ist die Tomate länger haltbar. Ein weiteres Beispiel für veränderte Inhaltsstoffe ist die zur Stärkeproduktion vorgesehene „Amflora-Kartoffel“. Die darin enthaltene Stärkeform ist für die industrielle Verwendung in der Papierindustrie sowie der Kleb- und Baustoffherstellung sehr gut geeignet.

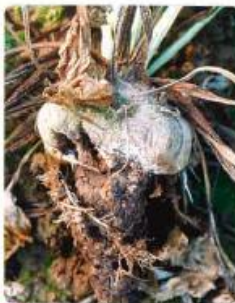

❶ Vom Rhizomania-Virus befallene Zuckerrübe

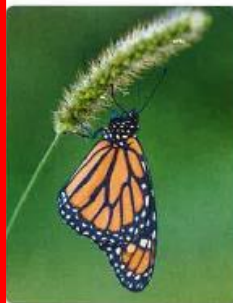

❷ Der Monarchfalter ist ein Wanderfalter aus Amerika. Er legt bei der Herbstwanderung rund 3600 km zurück.

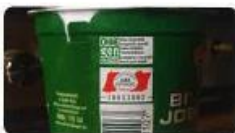

❸ Bei manchen Lebensmitteln wird bereits darauf hingewiesen, dass sie nicht gentechnisch verändert wurden („Genfrei“).

110 DER MENSCH

Figure S35. Expedition Biologie 4 (Schirl & Möslinger, 2015).



**Example of "No" 2 (see Figure S37):** It is not depicted which of the environmental influences shown can lead to which diseases.

**C 2.3.3 Are explanatory labels in the graphics or textual explanations linked to the illustration present?**

**→ If not, which ones are missing?**

If there is no caption and/or explanation in the illustration, this must be listed here. An explanation in the main text is also counted, if it clearly refers to the illustration. [No negative examples found.]

**C 2.3.3.1 Are they scientifically/technically correct?**

**→ If not, which ones are not?**

If mistakes are found in the labelling, this is to be listed here.

**Example of "Yes" (see Figure S19).**

**Example of "No" (see Figure S37):** The punctual assignment of the listed diseases by means of lines to the various respiratory organs is not correct.

**C 2.3.3.2 Is the labelling complete/comprehensive?**

**→ If not, which ones are not?**

It is to be noted, if not all elements of the figure are labelled.

**Example of "Yes" (see Figure S19).**

**Example of "No" (see Figure S37):** The respiratory organs are not labelled.



## **C 2.4 Are illustrations of symptoms of viral diseases displayed?**

**→ If yes, which ones?**

Illustrations depicting symptoms of viral diseases are to be listed here, e.g., photographs of the typical rash associated with measles disease.

**Examples of "yes" (see Figures S38 and S39):** Symptoms of rhizomania and foot-and-mouth disease, respectively, are shown in the illustrations.

## **K 2.5 Are there any tables and/or diagrams related to viruses?**

**→ If yes, which ones?**

All tables and diagrams related to viruses have to be listed here.

**Example of "Yes" 1 (see Figure S15).**

**Example of "Yes" 2 (see Figure S40).**

### **C 2.5.1 Are these tables/diagrams scientifically/technically correct?**

**→ If not, which ones are not?**

Mistakes found in tables or diagrams have to be listed here.

*[No mistakes were found in any of the tables.]*



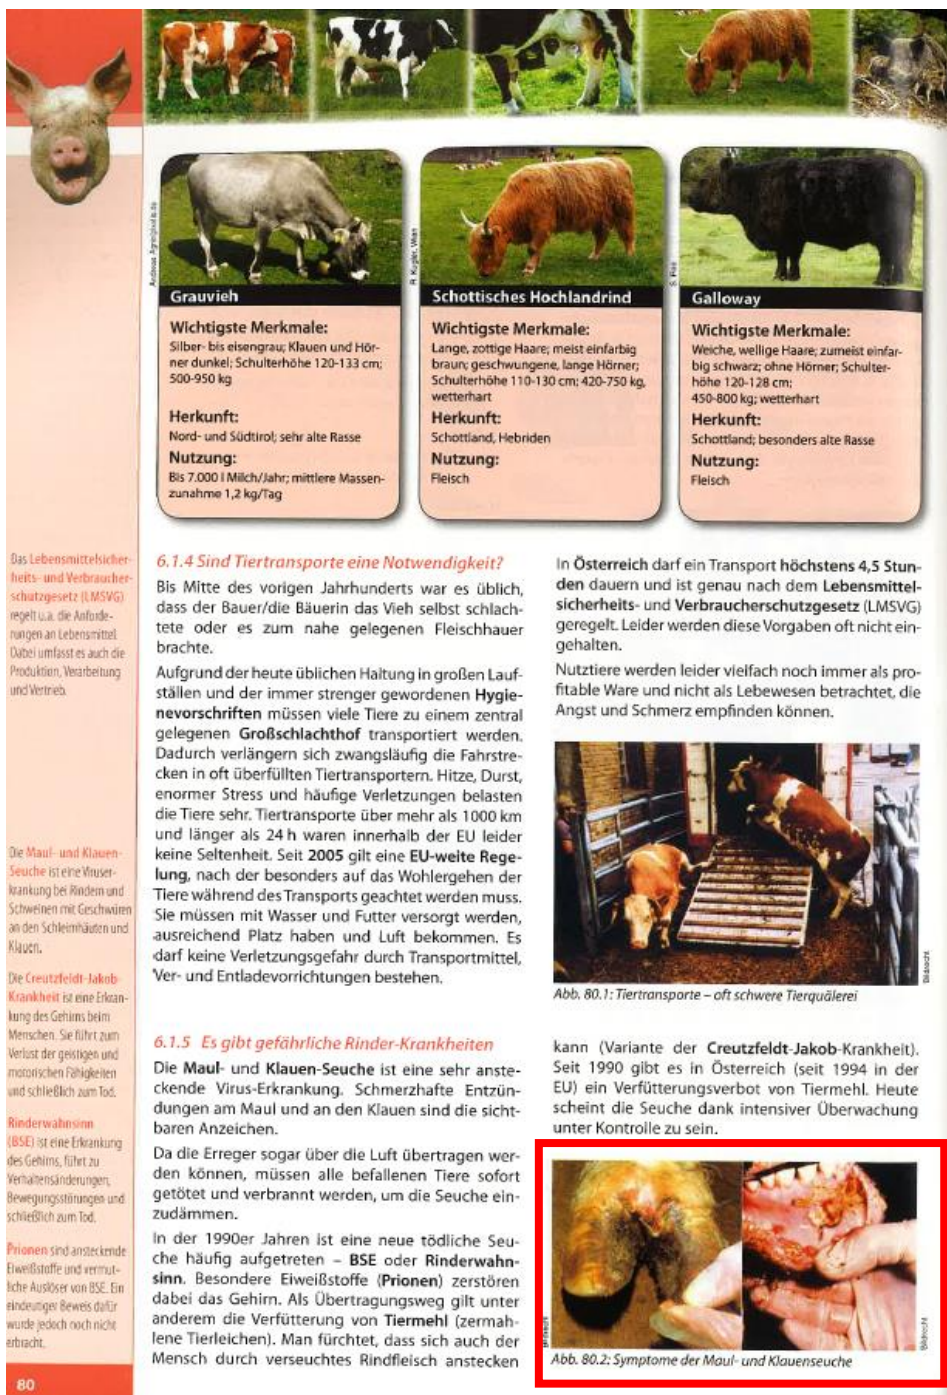

Figure S36. BIO Buch 3 neu (Kugler & Auer, 2016).



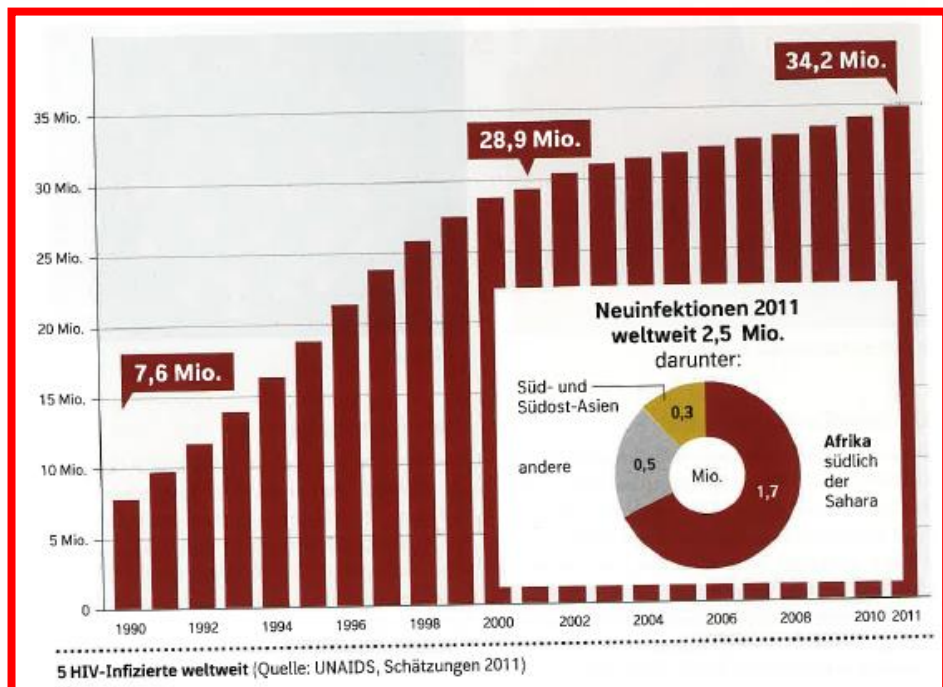

### Die Ansteckung

Eine Übertragung von HIV kann durch Blut, Samen- und Scheidenflüssigkeit und Muttermilch erfolgen. Daher ist das Infektionsrisiko bei folgenden Verhaltensweisen groß: bei häufigem Partnerwechsel mit Geschlechtsverkehr, bei Geschlechtsverkehr ohne Kondom, bei der Verwendung gebrauchter Injektionsnadeln und bei Bluttransfusionen mit HIV-verseuchten Blutkonserven.

### Krankheitsverlauf

Hat sich eine Person mit HIV infiziert, leidet sie im ersten Stadium der HIV-Erkrankung meistens an Fieber, Kopf- und Gliederschmerzen und vor allem an Lymphknotenschwellungen. Die infizierte Person produziert Antikörper, die in ihrem Blut nachgewiesen werden können. Man sagt, sie ist HIV-positiv.

Nach einer Infektion können viele Jahre, sogar Jahrzehnte vergehen, bis die Krankheit Aids ausbricht. Bei 50 % der Infizierten dauert es zehn Jahre. Jedoch kann es auch schon nach einigen Monaten zum vollständigen Ausbruch von Aids kommen. In diesem Stadium können relativ harmlose Infektionskrankheiten (z. B. eine Grippe) für die Erkrankten tödlich sein. In vielen Fällen ist auch das Zentralnervensystem betroffen. Es gibt noch keine heilenden Medikamente gegen Aids.

### Schwächung des Immunsystems

Unser Immunsystem ist normalerweise in der Lage, Krankheitserreger unschädlich zu machen. Aber gerade die weißen Blutkörperchen werden von den HI-Viren befallen und zerstört. Dadurch wird das Immunsystem des Körpers geschwächt.



### **C 3 - Language**

#### **C 3.1 Are there any scientific terms related to viruses (except virus and disease names)?**

**→ If yes, which ones?**

All scientific terms related to virology found in the text, figures, and individual sentences have to be listed in the "Type" field. Virus and disease names are not counted. Irrelevant foreign words are not counted (e.g., anonymous, solidarity, primary, research, etc.).

To facilitate the compilation of a catalogue of scientific terms and to avoid double counting, it is helpful to note all terms in the singular form for nouns and as infinitive for verbs. Exceptions are terms that are used much more frequently or exclusively in the plural (e.g.: antibiotics, bacteria, microorganisms, etc.). Each term is counted only once per textbook.

**Example of "yes":** "In Austria, foxes are successfully vaccinated against rabies, so that diseased animals are rare. If a fox is infected, it often approaches a human without shyness." (Biologie für alle 1, p. 87; Drexler et al., 2015).

The terms "vaccinated" and "infected" were counted as scientific terms and entered as "vaccinate" and "infect" in the "Type" field.

**Example of "No":** "One should avoid and not touch sick-looking or particularly trusting wild foxes." (BIOS 1, p. 64; Keil & Ruttner, 2010).

No term was noted for this sentence.

### **C 4 - Methodology and Didactics**

#### **C 4.1 Are there any student tasks related to virology?**



Here, tasks related to viruses are to be counted, when to be solved by students. For category 4.1, the sum of the tasks is entered. Subsequently, tasks are also to be classified into one of the following subcategories. In the case of multi-level tasks, the subtasks are assigned to the respective subcategories. This may result in the sum of the number of all subcategories being greater than the number of tasks in the main category 4.1.

**Example of a multilevel task (see Figure S41):** For this task, information must be researched and then assessed.

#### **C 4.1.1 Searching for information/working with information gathered from the book or elsewhere**

Tasks and subtasks in which content is to be researched and/or worked on by the student.

**Example of "Yes" 1:** "Search for information: What is meant by a) contact infection; b) smear infection?" (Begegnungen mit der Natur 4, p. 58; Biegl, 2012).

**Example of "Yes" 2:** "Without vaccination, rabies is fatal in both animals and humans. Find out more about it on the internet." (Neugierig auf Biologie 1, p. 65; Gloning & Hofer, 2017).

#### **K 4.1.2 Consolidation / deepening of knowledge**

Tasks and subtasks that serve to consolidate or deepen content knowledge, e.g., quiz questions, reports, or other forms of knowledge testing.



## Du kannst Erkenntnisse gewinnen

- E 1** Erläutere, warum das Ergebnis bei einem HIV-Test erst nach 6 Wochen ab der Ansteckung zuverlässig ist. Überlege erst, was genau bei einem solchen Test nachgewiesen wird, worauf das Testergebnis beruht und worauf bei der Interpretation der Testergebnisse zu achten ist.

- E 2** Du hast im Abschnitt „Methode“ zum Immunsystem über die Forschung nach einem Impfstoff gegen das Zika-Virus gelernt. Es mag verwundern, dass diese Suche, obwohl das Virus seit den 1940er Jahren bekannt war, erst 2015 aufgenommen wurde. Sieh dir folgende Grafik an und erkläre, warum dies vermutlich der Fall war.

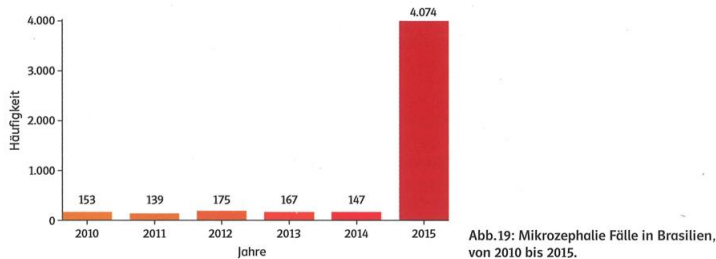

## Du kannst Standpunkte begründen und reflektiert handeln

- S 1** „Moskitos gehören zu den todbringendsten Tieren auf der Erde.“ Prüfe diesen Satz und begründe, ob, bzw. warum er zutrifft. Recherchiere dazu, wie das Dengue-Fieber, Malaria und Gelbfieber übertragen werden. Bewerte die Gefahren, die für dich in Österreich oder auf Reisen von Moskitos (Stechmücken, Gelsen) ausgehen und vergleiche verschiedene Möglichkeiten, dich zu schützen.

- S 2** Du hast gelernt, wovor uns Impfungen schützen können. Benutze dein Wissen um zu argumentieren, warum in Industrieländern wie Österreich, in denen Polio (Kinderlähmung) nicht mehr vorkommt, noch wie vor dagegen geimpft wird. Erkläre, was passieren könnte, wenn sämtliche österreichischen Babys nicht mehr gegen Polio geimpft würden. Argumentiere im Gegensatz dazu, warum die Pockenimpfung aus dem österreichischen Impfplan gestrichen wurde, obwohl diese Krankheit in der Vergangenheit ebenso schlimme Auswirkungen hatte.

- S 3** Nachdem Allergien bereits einen großen Teil der österreichischen Bevölkerung betreffen, gilt es Maßnahmen zu treffen, um damit zurechtzukommen. Erörtere, was man beachten könnte, um mit einer Pollenallergie besser zu leben. Recherchiere dazu, welche Aufgabe der Pollenwarndienst hat, und wie Allergiker und Allergikerinnen diese Informationen berücksichtigen können. Finde dazu die Internetseite des österreichischen Pollenwarndienstes und lies nach!



1) Großes Rätsel der Infektionskrankheiten – Löse dieses Kreuzworträtsel ★★★

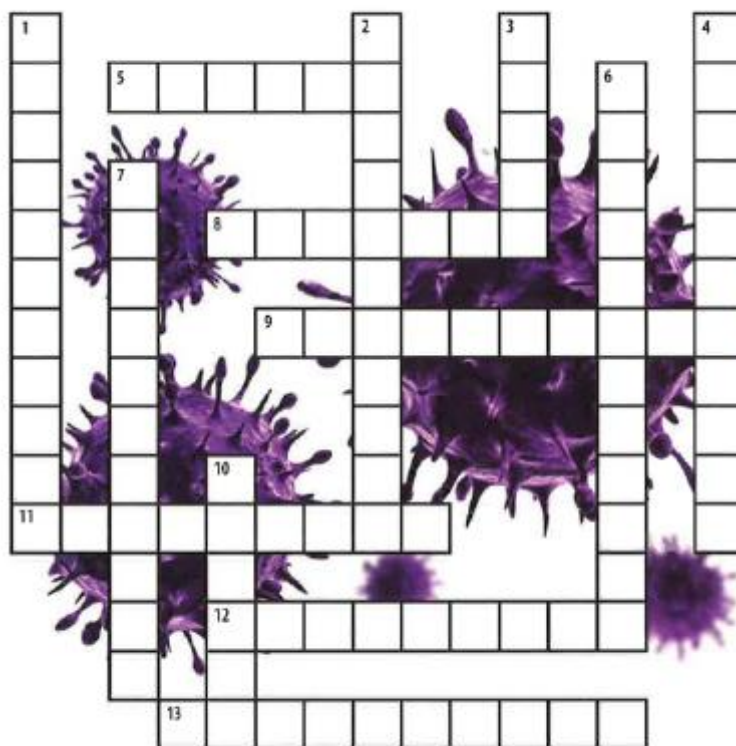

**senkrecht:**

1. Medikamente, die gegen bakterielle Erkrankungen helfen
2. Krankheitserreger, die durch den Verzehr von rohen Eiern in den Körper gelangen können
3. keine echten Lebewesen, können aber Erkrankungen hervorrufen
4. Viren brauchen sie, um sich zu vermehren.
6. Pilzsporen bleiben an ihnen haften.
7. bakterielle Lungenkrankheit
10. Ältere Menschen und Babys können an diesem viralen Infekt sterben.

**waagrecht:**

5. Körperflüssigkeit, in der das HI-Virus nachweisbar ist
8. mögliche Verursacher für BSE
9. Tiere, die manche Tropenkrankheiten übertragen
11. Stoffe, die eine übersteigerte Abwehrreaktion des Immunsystems hervorrufen können
12. tierische Einzeller, die z. B. Malaria verursachen
13. Milieu, das von Pilzen bevorzugt wird

Figure S39. Biologie für alle 4 (Drexler et al., 2016).

**Example of "Yes" 1:** "Describe the course of an infectious disease using the example of the common cold." (biologisch 4, p. 38; Schirl & Gereben-Krenn, 2017).

**Example of "Yes" 2 (see Figure S42):** A crossword puzzle on the topic of infectious diseases is to be solved.



### **C 4.1.3 Evaluation / Transfer**

Tasks and subtasks that require a transfer of knowledge to other fields, an ethical evaluation, or an evaluation of content.

**Example of "Yes" 1:** "In Austria, it is compulsory for a doctor to report a measles infection. Give reasons for this." (Gemeinsam Biologie 4, p. 26; Döring et al., 2018).

**Example of "Yes" 2:** "Some people feel uncomfortable in everyday interactions with people infected with HIV, because they are afraid of contracting HIV. Take a stand on this behaviour." (Gemeinsam Biologie 4, p. 89; Döring et al., 2018).

### **C 4.1.4 Gaining insight through theoretical or practical work (e.g., experimentation)**

Tasks and subtasks in which (thought) experiments are to be planned and/or conducted, or data from experiments analysed.

**Example of "Yes" 1:** "Viruses can also have RNA as hereditary information instead of DNA. In so-called retroviruses, the reproductive cycle in a host cell is more complex. Write down a hypothesis why this may be so. In doing so, consider the composition of DNA and RNA." (Linder Biologie 8, p. 147; Reitböck et al., 2019).

**Example of "Yes" 2 (see Figure S43):** The diagram shown is to be interpreted.



## Du kannst Erkenntnisse gewinnen

- E 1** Erläutere, warum das Ergebnis bei einem HIV-Test erst nach 6 Wochen ab der Ansteckung zuverlässig ist. Überlege erst, was genau bei einem solchen Test nachgewiesen wird, worauf das Testergebnis beruht und worauf bei der Interpretation der Testergebnisse zu achten ist.

- E 2** Du hast im Abschnitt „Methode“ zum Immunsystem über die Forschung nach einem Impfstoff gegen das Zika-Virus gelernt. Es mag verwundern, dass diese Suche, obwohl das Virus seit den 1940er Jahren bekannt war, erst 2015 aufgenommen wurde. Sieh dir folgende Grafik an und erkläre, warum dies vermutlich der Fall war.

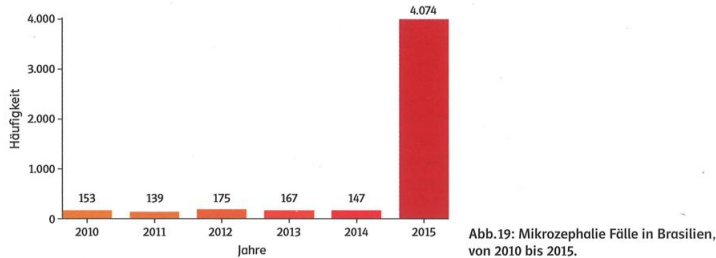

## Du kannst Standpunkte begründen und reflektiert handeln

- S 1** „Moskitos gehören zu den todbringendsten Tieren auf der Erde.“ Prüfe diesen Satz und begründe, ob, bzw. warum er zutrifft. Recherchiere dazu, wie das Dengue-Fieber, Malaria und Gelbfieber übertragen werden. Bewerte die Gefahren, die für dich in Österreich oder auf Reisen von Moskitos (Stechmücken, Gelsen) ausgehen und vergleiche verschiedene Möglichkeiten, dich zu schützen.

- S 2** Du hast gelernt, wovor uns Impfungen schützen können. Benutze dein Wissen um zu argumentieren, warum in Industrieländern wie Österreich, in denen Polio (Kinderlähmung) nicht mehr vorkommt, nach wie vor dagegen geimpft wird. Erkläre was passieren könnte, wenn sämtliche österreichischen Babys nicht mehr gegen Polio geimpft würden. Argumentiere im Gegensatz dazu, warum die Pockenimpfung aus dem österreichischen Impfplan gestrichen wurde, obwohl diese Krankheit in der Vergangenheit ebenso schlimme Auswirkungen hatte.

- S 3** Nachdem Allergien bereits einen großen Teil der österreichischen Bevölkerung betreffen, gilt es Maßnahmen zu treffen, um damit zurechtzukommen. Erörtere, was man beachten könnte, um mit einer Pollenallergie besser zu leben. Recherchiere dazu, welche Aufgabe der Pollenwarndienst hat, und wie Allergiker und Allergikerinnen diese Informationen berücksichtigen können. Finde dazu die Internetseite des österreichischen Pollenwarndienstes und lies nach!



**C 4.2 Is there any attempt to connect to students' daily life? / Is content presented as relevant to students?**

**→ If yes, how?**

Here, it is to be listed, if virus-related content is phrased and presented in such a way that it relates to the students' daily life and made relevant to them.

**Example of "yes" 1:** "Fig. 1: The body's defence against pathogens using the "common cold" as an example. Every time we sneeze, thousands of tiny droplets loaded with viruses are sprayed. That's why the common cold often spreads rapidly in a school class." (B & U 4, p. 29; Schullerer & Burgstaller, 2013).

**Example of "Yes" 2 (see Figure S44):** Here, a short story is told and illustrated with pictures.

**C 5 - Special features worth mentioning**

Anything that a particular rater finds particularly noteworthy in addition to the existing categories can be mentioned here.



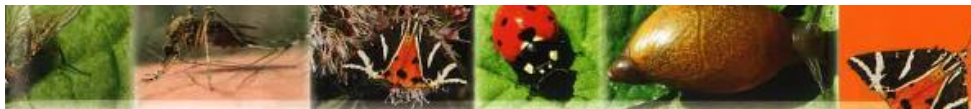

### §.2.8 Die Zecke – eine gefährliche Milbe

Im Sommer – wenn du auf einer Wiese sitzt und die Sonne genießt – klettert zuweilen ein kleines dunkles Tier langsam an deiner nackten Wade hoch: eine **Zecke**. Wenn du diese **Blut saugende Milbe** entdeckst, bevor sie sich in der Haut festgebissen hat, ist sie noch harmlos. Wisch sie einfach weg. Wenn du sie aber nicht bemerkst, beißt sie sich bevorzugt an Stellen fest, wo die Haut besonders dünn ist, wie z. B. die Kniekehle oder an den Innenschenkeln.

#### EXTRA

Wiemer als nur ein kleiner Blutvenus!

Bei einem Zeckenbiss besteht die Gefahr, dass wir mit dem gefährlichen Erreger der **Frühsummer-Gehirnhaut- und Gehirnentzündung (FSME)** infiziert werden. Neben harmlosen Reaktionen wie Kopfschmerzen und Fieber kann diese Krankheit auch schwere **Lähmungen** hervorrufen oder sogar zum **Tod** führen. Zum Glück kann man sich schützen, indem man regelmäßig zur Zeckenimpfung geht. Durch einen Zeckenbiss kann man auch an **Borreliose** erkranken. Borrelien sind Bakterien, die Fieberanfälle und Entzündungen hervorrufen können. Bei einer Infektion entsteht um die Bissstelle ein **roter, ringförmiger Fleck**. Innerhalb der nächsten Wochen vergrößert sich der **Ring**, während das Zentrum verblasst. Bei diesen Symptomen unbedingt einen Arzt oder eine Ärztin aufsuchen. Die Infektion ist im Frühstadium gut behandelbar.

Bei Zecken ist das Kopf-Bruststück mit dem breiten, flachen Hinterleib verschmolzen. Nach dem Saugen schwillt der Hinterleib auf das Mehrfache seiner ursprünglichen Größe an, wenn er prall mit Blut gefüllt ist. Bald nach einer Mahlzeit legt das Weibchen etwa **3000 Eier** in den Boden, aus denen winzige, **sechsheinige Larven** schlüpfen. Sie sehen ihren Eltern bereits sehr ähnlich und befallen bald die ersten kleinen Wirbeltiere (Nagetiere, Vögel, Echsen), um Blut zu saugen. Aus den Larven entwickeln sich **8-beinige Nymphen** (= weiter entwickelte Jugendstadien), aus denen **geschlechtsreife Zecken** entstehen.

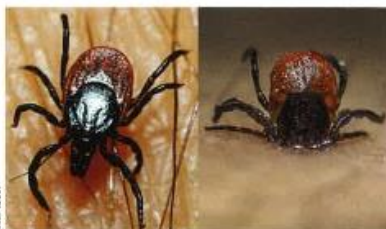

Abb. 73.1: Eine Zecke (Gemeiner Holzbock) sucht eine geeignete Stelle und beißt sich in der Haut fest

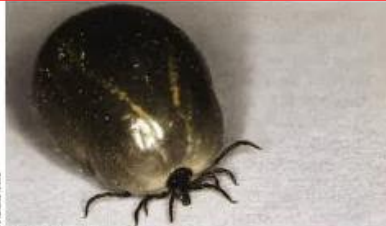

Abb. 73.2: Vollgesogene Zecke

**MERK DIR!** Zecken gehören zu den Milben, leben in Wäldern und auf Wiesen. Die Weibchen saugen Wirbeltierblut. Durch ihren Biss können sie die Erreger der gefährlichen Frühsummer-Gehirnhaut- und Gehirnentzündung auf Menschen übertragen. Lass dich dagegen impfen!

#### ÜBRIGENS ...

- lassen sich Zecken nicht aus dem Laub von Sträuchern und Bäumen fallen, sondern werden vom Laub abgestreift oder lauern an Grashalmen auf das Wirtstier;
- gibt es bestimmte Regionen, in denen besonders viele infizierte Zecken leben. Erkundige dich bei deinem Hausarzt oder deiner Hausärztin.

Klasse: Spinnentiere  
Ordnung: Zecken  
Art: Gemeiner Holzbock

Die **Frühsummer-Gehirnhaut- und Gehirnentzündung (FSME)** ist eine schwere Erkrankung des Nervensystems und kann zum Tod führen.

Die **Zeckenimpfung** schützt vor FSME, muss jedoch regelmäßig erneuert werden. Achtung: Diese Impfung schützt nicht vor Borreliose!

**Borreliose** ist eine Infektion durch Bakterien (Borrelien) und führt zu Schäden am Nervensystem.

Nymphen sind fast erwachsene Tiere.

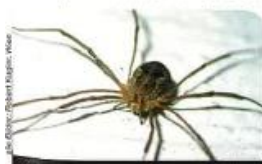

#### Weberknecht

**Wichtigste Merkmale:**  
Bis 9 mm groß; Spannweite bis 10 cm;  
Hinterleib nicht abgesetzt; ein Augenpaar; keine Spinnwarzen  
**Lebensraum:**  
Weit verbreitet  
**Nahrung:**  
Allesfresser

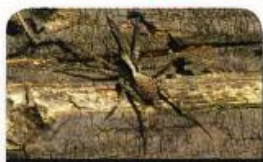

#### Familie Wolfsspinnen

**Wichtigste Merkmale:**  
Bis 11 mm groß; Spannweite 4 cm;  
gute Läufer, kein Netzbau; Kokons und Junge werden am Hinterleib getragen  
**Lebensraum:**  
Weit verbreitet; Bodenbewohner  
**Nahrung:**  
Insekten

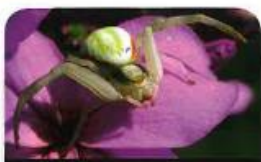

#### Familie Krabbenspinnen

**Wichtigste Merkmale:**  
Krabbenähnliches Aussehen; bis 10 mm, 2 vordere Beinpaare länger, bunte Tarnfarben (gelb, weiß, grün); läuft seitwärts  
**Lebensraum:**  
Blüten, Wiesen  
**Nahrung:**  
Insekten
