# Supplementary material for: Virology in Schoolbooks—A Comprehensive Analysis of Austrian Biology Textbooks for Secondary School and Implications for Improvement
Source: MDPI journal article supplement (doi:10.3390/su141811562), 2022-09-15
Supplement: s1 [file s1]

Supplementary Material S5. Extent of virology in the analysed schoolbooks. Books without any virus-related content at all are not listed.

| Grade | Schoolbook                          | Total pages | Pages with virus-related content | Per cent |
|-------|-------------------------------------|-------------|----------------------------------|----------|
| 5     | Über die Natur 1                    | 144         | 0.1                              | 0.07%    |
| 5     | Neugierig auf ... BIOLOGIE 1        | 152         | 0.2                              | 0.13%    |
| 5     | Welt des Lebens 1                   | 136         | 0.2                              | 0.15%    |
| 5     | Biologie für alle 1                 | 160         | 0.25                             | 0.16%    |
| 5     | biologie aktiv 1                    | 120         | 0.2                              | 0.17%    |
| 5     | B & U 1 NEU                         | 136         | 0.3                              | 0.22%    |
| 5     | Das BioTOP 1                        | 128         | 0.3                              | 0.23%    |
| 5     | Begegnungen mit d. Natur 1          | 144         | 0.5                              | 0.35%    |
| 6     | ganz klar: Biologie 2               | 144         | 0.1                              | 0.07%    |
| 6     | Neugierig auf ... BIOLOGIE 2        | 144         | 0.1                              | 0.07%    |
| 6     | Begegnungen mit der Natur 2         | 128         | 0.2                              | 0.16%    |
| 6     | basic biology 2                     | 120         | 0.2                              | 0.17%    |
| 6     | BIO LOGISCH 2                       | 164         | 0.3                              | 0.18%    |
| 6     | BIObuch 2 neu                       | 144         | 0.3                              | 0.21%    |
| 6     | Über die Natur 2                    | 128         | 0.3                              | 0.23%    |
| 6     | Welt des Lebens 2                   | 128         | 0.3                              | 0.23%    |
| 6     | Biologie für alle 2                 | 156         | 0.4                              | 0.26%    |
| 6     | bio@school 2                        | 144         | 0.4                              | 0.28%    |
| 6     | BIOS 2                              | 136         | 0.4                              | 0.29%    |
| 6     | Gemeinsam: Biologie 2               | 168         | 0.5                              | 0.30%    |
| 6     | Expedition Biologie 2               | 128         | 0.4                              | 0.31%    |
| 6     | Mehrfach. Biologie 2. Teil 1 Wissen | 64          | 0.2                              | 0.31%    |
| 6     | Das BioTOP 2                        | 128         | 0.5                              | 0.39%    |
| 6     | Vom Leben 2                         | 104         | 0.5                              | 0.48%    |
| 6     | einfach bio 2                       | 144         | 0.75                             | 0.52%    |
| 6     | biologie aktiv 2 neu                | 140         | 3                                | 2.14%    |
| 7     | BIObuch 3 neu                       | 136         | 0.1                              | 0.07%    |
| 7     | Welt des Lebens 3                   | 136         | 0.1                              | 0.07%    |
| 7     | Expedition Biologie 3               | 96          | 0.1                              | 0.10%    |
| 7     | Biologie für alle 3                 | 152         | 0.2                              | 0.13%    |
| 7     | Begegnungen mit der Natur 3         | 132         | 0.2                              | 0.15%    |
| 7     | Mehrfach. Biologie 3. Teil 1 Wissen | 64          | 0.2                              | 0.31%    |
| 8     | Welt des Lebens 4                   | 144         | 2                                | 1.39%    |
| 8     | BIObuch 4 neu                       | 128         | 2.5                              | 1.95%    |
| 8     | Vom Leben 4                         | 160         | 3.2                              | 2.00%    |
| 8     | Mehrfach. Biologie 4. Teil 1 Wissen | 64          | 1.3                              | 2.03%    |
| 8     | Gemeinsam: Biologie 4               | 168         | 4.1                              | 2.44%    |
| 8     | Neugierig auf ... BIOLOGIE 4        | 144         | 3.6                              | 2.50%    |
| 8     | ganz klar: Biologie 4               | 164         | 4.35                             | 2.65%    |
| 8     | biologie aktiv 4 neu                | 144         | 4.1                              | 2.85%    |

|    |                              |     |      |       |
|----|------------------------------|-----|------|-------|
| 8  | Begegnungen mit der Natur 4  | 144 | 4.3  | 2.99% |
| 8  | B & U 4 NEU                  | 128 | 4    | 3.13% |
| 8  | bio@school 4                 | 152 | 5    | 3.29% |
| 8  | Das BioTOP 4                 | 128 | 4.8  | 3.75% |
| 8  | Biologie für alle 4          | 176 | 7.3  | 4.15% |
| 8  | BIOS 4                       | 152 | 6.4  | 4.21% |
| 8  | basic biology 4              | 116 | 5    | 4.31% |
| 8  | Erlebnis Natur 4             | 152 | 6.9  | 4.54% |
| 8  | Expedition Biologie 4        | 136 | 6.3  | 4.63% |
| 8  | BIO LOGISCH 4, neu           | 168 | 8.3  | 4.94% |
| 8  | Über die Natur 4             | 128 | 1.7  | 1.33% |
| 9  | klar_Biologie 5              | 160 | 0.2  | 0.13% |
| 9  | am Puls Biologie 5           | 176 | 0.3  | 0.17% |
| 9  | Kernbereiche Biologie 5, neu | 188 | 0.4  | 0.21% |
| 9  | Linder Biologie 5, neu       | 216 | 0.7  | 0.32% |
| 9  | Begegnungen mit der Natur 5  | 192 | 1.1  | 0.57% |
| 9  | bio@school 5. NEU            | 192 | 2.3  | 1.20% |
| 10 | Linder Biologie 6, neu       | 256 | 4.7  | 1.84% |
| 10 | Kernbereiche Biologie 6, neu | 196 | 3.7  | 1.89% |
| 10 | bio@school 6. NEU            | 216 | 4.2  | 1.94% |
| 10 | klar_Biologie 6              | 168 | 3.9  | 2.32% |
| 10 | Begegnungen mit der Natur 6  | 200 | 6.7  | 3.35% |
| 10 | am Puls Biologie 6           | 176 | 6.5  | 3.69% |
| 11 | am Puls Biologie 7           | 128 | 10.8 | 8.44% |
| 12 | Kernbereiche Biologie 8. neu | 172 | 1.5  | 0.87% |
| 12 | klar_Biologie 8              | 144 | 2    | 1.39% |
| 12 | bio@school 8                 | 176 | 4.5  | 2.56% |
| 12 | Biologie 8                   | 160 | 4.5  | 2.81% |
| 12 | Linder Biologie–8 - Akt.     | 200 | 6    | 3.00% |
| 12 | am Puls Biologie 8           | 144 | 4.9  | 3.40% |
| 12 | Begegnungen mit d. Natur 8   | 144 | 5.5  | 3.82% |
